# Supplementary material
Source: PubMed Central journal article supplement (PMC3910977)

**Supplementary table 1.** Fatty acid composition of total lipids in the CC1010 cells grown with different concentrations of CO<sub>2</sub>. Experiments were performed in duplicate or quadruplicate. Measurements were performed in duplicate in each experiment. Each value is a mean ± standard error of the results obtained from four or eight measurements.

| Fatty acid                      | Aeration |                    |                    |          |                    |                    |
|---------------------------------|----------|--------------------|--------------------|----------|--------------------|--------------------|
|                                 | MBM      |                    |                    | MBM-noN  |                    |                    |
|                                 | Air      | 1% CO <sub>2</sub> | 5% CO <sub>2</sub> | Air      | 1% CO <sub>2</sub> | 5% CO <sub>2</sub> |
| 14:0                            | 0.5±0.1  | 0.5±0.0            | 0.5±0.0            | 0.4±0.0  | 0.7±0.0            | 0.5±0.0            |
| 16:0                            | 21.0±0.2 | 22.6±0.4           | 19.0±0.4           | 29.0±0.4 | 35.8±0.4           | 30.7±0.8           |
| 16:1(7) and 16:1(3t)            | 2.9±0.3  | 3.4±0.3            | 5.2±0.3            | 2.2±0.4  | 1.1±0.1            | 2.3±0.3            |
| 16:1(9)                         | 0.0±0.0  | 0.0±0.0            | 0.0±0.0            | 0.0±0.0  | 0.0±0.0            | 0.0±0.0            |
| 16:1(11)                        | 0.0±0.0  | 0.0±0.0            | 0.0±0.0            | 0.0±0.0  | 0.0±0.0            | 0.0±0.0            |
| 16:2(7,10)                      | 3.7±0.6  | 2.7±0.4            | 4.1±0.3            | 3.7±0.1  | 1.5±0.0            | 2.1±0.4            |
| 16:3(4,7,10)                    | 1.7±0.1  | 1.9±0.0            | 2.3±0.0            | 1.1±0.1  | 1.0±0.0            | 1.5±0.1            |
| 16:3(7,10,13)                   | 4.6±0.2  | 3.8±0.1            | 3.8±0.1            | 3.8±0.3  | 2.3±0.0            | 2.5±0.1            |
| 16:4(4,7,10,13)                 | 12.8±0.9 | 13.6±0.7           | 12.5±0.4           | 5.2±0.1  | 6.8±0.3            | 8.2±0.5            |
| 17:0                            | 0.0±0.0  | 0.0±0.0            | 0.0±0.0            | 0.0±0.0  | 0.0±0.0            | 0.0±0.0            |
| 18:0                            | 2.7±0.2  | 2.7±0.1            | 2.1±0.1            | 2.8±0.0  | 3.0±0.1            | 3.4±0.3            |
| 18:1(9)                         | 1.6±0.3  | 3.6±0.6            | 7.8±0.4            | 8.8±1.2  | 5.8±0.2            | 3.7±0.5            |
| 18:1(11)                        | 3.7±0.3  | 2.9±0.0            | 2.7±0.1            | 5.7±0.1  | 5.4±0.0            | 5.1±0.2            |
| 18:2(9,12)                      | 12.4±1.3 | 11.4±0.8           | 12.7±0.6           | 15.2±0.5 | 11.6±0.7           | 10.1±0.9           |
| 18:3(5,9,12)                    | 7.5±0.4  | 8.1±0.9            | 6.8±0.2            | 6.8±0.4  | 10.0±0.3           | 12.0±0.6           |
| 18:3(9,12,15)                   | 22.2±1.2 | 20.7±1.1           | 18.3±0.5           | 13.8±0.2 | 13.4±0.2           | 15.3±0.6           |
| 18:4(5,9,12,15) and (6,9,12,15) | 2.8±0.1  | 2.1±0.0            | 2.1±0.1            | 1.6±0.0  | 1.7±0.2            | 2.4±0.0            |

**Supplementary table 2.** Fatty acid composition of TAG in the CC1010 cells grown with different concentrations of CO<sub>2</sub>. Experiments were performed in duplicate or quadruplicate. Measurements were performed in duplicate in each experiment. Each value is a mean ± standard error of the results obtained from four or eight measurements.

| Fatty acid                      | Aeration |                    |                    |          |                    |                    |
|---------------------------------|----------|--------------------|--------------------|----------|--------------------|--------------------|
|                                 | MBM      |                    |                    | MBM-noN  |                    |                    |
|                                 | Air      | 1% CO <sub>2</sub> | 5% CO <sub>2</sub> | Air      | 1% CO <sub>2</sub> | 5% CO <sub>2</sub> |
| 14:0                            | 9.7±3.1  | 11.0±3.0           | 1.8±0.3            | 0.5±0.0  | 0.9±0.1            | 0.9±0.1            |
| 16:0                            | 42.0±2.4 | 48.7±1.1           | 12.5±1.9           | 31.1±1.0 | 38.8±0.3           | 35.3±1.8           |
| 16:1(7) and 16:1(3t)            | 2.5±0.9  | 3.5±0.6            | 2.6±0.4            | 2.2±0.6  | 1.2±0.1            | 2.6±0.2            |
| 16:1(9)                         | 0.0±0.0  | 0.0±0.0            | 0.0±0.0            | 0.0±0.0  | 0.0±0.0            | 0.0±0.0            |
| 16:1(11)                        | 0.3±0.3  | 0.0±0.0            | 0.1±0.1            | 0.0±0.0  | 0.0±0.0            | 0.0±0.0            |
| 16:2(7,10)                      | 1.9±0.8  | 3.8±0.4            | 3.7±0.1            | 3.8±0.1  | 1.7±0.1            | 1.9±0.3            |
| 16:3(4,7,10)                    | 0.2±0.1  | 0.2±0.2            | 1.4±0.1            | 0.7±0.1  | 0.4±0.0            | 0.6±0.1            |
| 16:3(7,10,13)                   | 1.1±0.6  | 0.5±0.3            | 4.0±0.2            | 3.4±0.3  | 2.2±0.1            | 2.6±0.3            |
| 16:4(4,7,10,13)                 | 2.4±0.8  | 1.7±0.1            | 16.1±0.9           | 4.1±0.0  | 5.2±0.3            | 7.6±0.4            |
| 17:0                            | 0.0±0.0  | 0.0±0.0            | 0.0±0.0            | 0.0±0.0  | 0.0±0.0            | 0.0±0.0            |
| 18:0                            | 17.3±2.6 | 9.5±1.4            | 2.9±0.5            | 3.1±0.1  | 2.5±0.1            | 2.5±0.1            |
| 18:1(9)                         | 4.9±0.8  | 7.0±0.1            | 6.1±0.1            | 12.6±1.0 | 9.3±0.3            | 5.9±0.7            |
| 18:1(11)                        | 2.6±0.8  | 2.5±0.3            | 2.0±0.1            | 6.3±0.1  | 5.5±0.1            | 4.9±0.2            |
| 18:2(9,12)                      | 6.8±2.4  | 4.1±1.1            | 10.8±0.2           | 14.2±0.2 | 13.0±0.9           | 10.7±0.5           |
| 18:3(5,9,12)                    | 2.8±1.0  | 3.7±1.3            | 12.0±0.3           | 6.0±0.4  | 8.6±0.1            | 10.6±0.6           |
| 18:3(9,12,15)                   | 3.7±1.6  | 2.5±0.7            | 17.1±0.5           | 10.5±0.1 | 9.0±0.1            | 11.2±0.5           |
| 18:4(5,9,12,15) and (6,9,12,15) | 1.6±0.5  | 1.3±0.4            | 6.9±0.6            | 1.6±0.1  | 1.6±0.1            | 2.9±0.1            |

Supplementary document

**Critical identification of fatty acids in Chlamydomonas  
by GC-MS**

April, 2013

Department of Life Sciences  
Graduate School of Arts and Sciences

University of Tokyo

Kenta Sakurai and Naoki Sato

[askenta@mail.ecc.u-tokyo.ac.jp](mailto:askenta@mail.ecc.u-tokyo.ac.jp)

[naokisat@bio.c.u-tokyo.ac.jp](mailto:naokisat@bio.c.u-tokyo.ac.jp)

Copyright 2013 Sato Laboratory

All rights reserved.

## Contents

|                                                                   |      |
|-------------------------------------------------------------------|------|
| Materials and Methods .....                                       | 1-4  |
| Algal strain .....                                                | 1-4  |
| Growth .....                                                      | 1-4  |
| Extraction of lipids .....                                        | 1-4  |
| Separation of lipids .....                                        | 1-4  |
| Preparation of fatty acid methyl esters .....                     | 1-5  |
| Preparation of fatty acid pyrrolidides .....                      | 1-5  |
| Preparation of trimethylsilylated hydroxy derivatives .....       | 1-5  |
| Gas chromatography .....                                          | 1-6  |
| Gas chromatography-mass spectrometry (GC-MS) .....                | 1-6  |
| <br>                                                              |      |
| Retention times of fatty acids derivatives (Table1).....          | 2-1  |
| <br>                                                              |      |
| List of molecular weights of fatty acid derivatives (Table2)..... | 3-1  |
| <br>                                                              |      |
| Mass spectra.....                                                 | 4-1  |
| 16:1(7).....                                                      | 4-1  |
| 16:1(3t).....                                                     | 4-2  |
| 16:1(9).....                                                      | 4-3  |
| 16:1(11).....                                                     | 4-4  |
| 16:2(7,10).....                                                   | 4-5  |
| 16:3(4,7,10).....                                                 | 4-6  |
| 16:3(7,10,13).....                                                | 4-7  |
| 16:4(4,7,10,13).....                                              | 4-8  |
| 17:1(8).....                                                      | 4-9  |
| 17:1(9).....                                                      | 4-10 |
| 17:1(10).....                                                     | 4-11 |

|                      |      |
|----------------------|------|
| 17:1(11).....        | 4-12 |
| 18:1(9).....         | 4-13 |
| 18:1(11).....        | 4-14 |
| 18:1(13).....        | 4-15 |
| 18:2(9,12).....      | 4-16 |
| 18:3(5,9,12).....    | 4-17 |
| 18:3(9,12,15).....   | 4-18 |
| 18:4(5,9,12,15)..... | 4-19 |
| 18:4(6,9,12,15)..... | 4-20 |
| 19:1(10).....        | 4-21 |
| 19:1(13).....        | 4-22 |
| 20:1(11).....        | 4-23 |
| 22:1(13).....        | 4-24 |

## Materials and Methods

### Algal strain

The green alga *Chlamydomonas reinhardtii* strain CC1010 was obtained from the Chlamydomonas Resource Center (St. Paul, MN).

### Growth

The algal cells were grown at 25°C in flat culture flasks (capacity: 500 ml with air space) filled with 500 ml of modified Bristol's medium (MBM: 1) with continuous aeration by 1% CO<sub>2</sub> in air. In some experiments, aeration was provided by either 5% CO<sub>2</sub> in air or ordinary air. Light (45 μmol m<sup>-2</sup> s<sup>-1</sup>) was provided by a bank of white fluorescent tubes (model FL20S FR P, Panasonic, Osaka, Japan; color temperature at 6700 K). MBM contained, per liter, 250 mg KNO<sub>3</sub>, 7.5 mg MgSO<sub>4</sub> 7H<sub>2</sub>O, 25 mg NaCl, 7.5 mg K<sub>2</sub>HPO<sub>4</sub>, 175 mg KH<sub>2</sub>PO<sub>4</sub>, 13 mg Ca(NO<sub>3</sub>) 4H<sub>2</sub>O, 2 ml Fe stock solution and 1 mL A5 solution (pH was adjusted to 6.5 with 1N NaOH). The Fe stock solution contained 0.5 g L<sup>-1</sup> FeSO<sub>4</sub> 7H<sub>2</sub>O, whereas the A5 solution contained, per liter, 2.8 g H<sub>3</sub>BO<sub>3</sub>, 2.5 g MnSO<sub>4</sub> 7H<sub>2</sub>O, 0.2 g ZnSO<sub>4</sub> 7H<sub>2</sub>O, 0.07 g CuSO<sub>4</sub> 5H<sub>2</sub>O and 0.02 g Na<sub>2</sub>MoO<sub>4</sub> 2H<sub>2</sub>O. KNO<sub>3</sub> was not added in the nitrogen-deplete medium, which we designated as MBM-noN. It included 10 mg L<sup>-1</sup> CaCl<sub>2</sub> 2H<sub>2</sub>O instead of Ca(NO<sub>3</sub>) 4H<sub>2</sub>O.

### Extraction of lipids

The algal cells were harvested by centrifugation (3,000 × g, 10 min, at 4°C) at a density of 2 × 10<sup>6</sup> - 5 × 10<sup>6</sup> cells ml<sup>-1</sup> (about 40 ml). Total lipids were extracted by the method of Bligh and Dyer (1959) (2). The chloroform phase was evaporated under vacuum. The lipids were dissolved in 0.4 ml of chloroform-methanol (2:1, v/v), and stored at -20°C until use.

### Separation of lipids

Lipid classes were separated by two-dimensional thin-layer chromatography (2D-TLC) according to Sato and Furuya (1983) (3). Lipid solution (180 μl) was spotted on a silica gel plate (20 cm × 20 cm, TLC Silica gel 60 plate, Catalog Number 5721, Merck, Darmstadt,

Germany) at a position 25 mm × 25 mm from one corner. The first dimension was developed with acetone-benzene-methanol-water (8:3:2:1, by volume) to the top of the plate. After drying for 30 min, the second dimension was developed with chloroform-acetone-methanol-acetic acid-water (10:4:2:3:1, by volume) until the front reached the height of 12.5 cm. After drying again, the plate was further developed in the second dimension with *n*-hexane-diethyl ether-acetic acid (80:30:1, by volume) to the top of the plate. After drying, the plate was sprayed with 0.01% primuline in 80% aqueous acetone. Lipid spots were detected under UV light at 365 nm.

### **Preparation of fatty acid methyl esters**

Each lipid class was scraped off the plate with a razor blade, and transferred in a Pyrex glass tube with a screw cap. Then, 2 ml of 2.5% HCl in anhydrous methanol (Kanto Kagaku, Ltd., Tokyo, Japan) was added. The tube was placed in a heating block at 85°C for 2.5 h. After cooling, fatty acid methyl esters (FAME) were extracted four times with 2 ml *n*-hexane. For the final extraction, 1 ml water was added to achieve complete extraction of FAME into the *n*-hexane phase. The solvent was removed under vacuum, and the resultant FAME was dissolved in a small volume of *n*-hexane, and stored at -20°C until analysis. Pentadecanoic acid (15:0) was added before the methanolysis as an internal standard for quantification of fatty acid methyl esters by gas chromatography (GC).

### **Preparation of fatty acid pyrrolidides**

An aliquot of FAME solution was evaporated to dryness, and then dissolved in 20 µl of pyrrolidine. After addition of 2 µl of acetic acid, the mixture was placed in a heating block at 100°C for 30 min. The reaction mixture was directly analyzed by GC (4).

### **Preparation of trimethylsilylated hydroxy derivatives**

An aliquot of FAME solution was evaporated to dryness and then dissolved in 500 µl of dioxane-pyridine (8:1, by volume). After adding of 50 µl of 5% osmium tetroxide in dioxane, the mixture was kept at ambient temperature for 30 min with continuous stirring. Then 1.25 ml of methanol and 4.25 ml of 20% aqueous sodium sulfite were added to the mixture. After

standing for 1 h, the mixture was centrifuged at  $750 \times g$  for 20 min at  $15^{\circ}\text{C}$ . The supernatant was clarified by filtration through a glass-fiber paper (type GF/F, Whatman International Ltd., Maidstone, Kent, UK), and then evaporated under vacuum. The residue (perhydroxylated FAME) was completely dried in a vacuum desiccator for 15 min. The final residue was extracted with diethyl ether and then with methanol. Each of the extracts was dried under vacuum. Trimethylsilylation was performed by adding 20  $\mu\text{l}$  of the reagent TMS-BA (Tokyo Kasei, Ltd., Tokyo, Japan) and the mixture was kept at  $80^{\circ}\text{C}$  for 10 min (5-7).

### **Gas chromatography**

FAME was analyzed by a gas chromatograph (model GC-2014, Shimadzu, Kyoto, Japan) equipped with a flame ionization detector and a capillary column (ULBON HR-SS-10, 50 m in length, 0.25 mm in internal diameter, Shinwa Chemical Co., Kyoto, Japan). The temperature of the column was kept at  $180^{\circ}\text{C}$  for 5 min, and then elevated to  $230^{\circ}\text{C}$  at a rate of  $3^{\circ}\text{C min}^{-1}$ . The flow rate of the carrier gas (nitrogen) was  $1 \text{ ml min}^{-1}$ . Peak areas on the gas chromatogram were used to calculate the relative molar amounts of fatty acids. Absolute amounts were calculated using the internal standard 15:0. The amounts of lipid classes were determined based on the amounts of fatty acids.

### **Gas chromatography-mass spectrometry (GC-MS)**

FAME, fatty acid pyrrolidides, and trimethylated derivatives of hydroxyl fatty acids were analyzed by a gas chromatograph-mass spectrometer (model GCMS-QP2010 Ultra, Shimadzu). High-grade pure helium (He) was used as the carrier gas. The ionization voltage was 70 eV, and ionization temperature was  $200^{\circ}\text{C}$ . Mass spectra were scanned every 0.2 s.

For the analysis of FAME, a BPX70 column (60 m in length, 0.22 mm in internal diameter, SGE Analytical Science, Victoria, Australia) was used. The column temperature was elevated from  $170^{\circ}\text{C}$  to  $250^{\circ}\text{C}$  at a rate of  $3^{\circ}\text{C min}^{-1}$ , and then kept at  $250^{\circ}\text{C}$  for 5 min. The flow rate of helium carrier gas was  $0.85 \text{ ml min}^{-1}$ .

Fatty acid pyrrolidides were also analyzed with the BPX70 column. The column temperature was first kept at  $200^{\circ}\text{C}$  for 1 min, elevated to  $250^{\circ}\text{C}$  at a rate of  $10^{\circ}\text{C min}^{-1}$ , kept at  $250^{\circ}\text{C}$  for 25 min, elevated to  $260^{\circ}\text{C}$  at a rate of  $2^{\circ}\text{C min}^{-1}$ , and finally kept at  $260^{\circ}\text{C}$  for 5



min. The flow rate of He carrier was 0.84 ml min<sup>-1</sup>.

Trimethylsilylated derivatives of hydroxylated fatty acids were analyzed with a non-polar column, Rtx-5MS (30 m in length, 0.25 mm in internal diameter, RESTEK, Bellefonte, PA). The column temperature was initially kept at 150°C for 1 min, elevated to 300°C at a rate of 7°C min<sup>-1</sup>, kept at 300°C for 10 min, elevated to 330°C at a rate of 7°C min<sup>-1</sup>, and finally kept at 330°C for 5 min. The flow rate of He gas was 1.40 ml min<sup>-1</sup>.

We present representative spectra. It was sometimes necessary to show spectra obtained with different classes of lipids to show better spectra of overlapping isomers. By combining the three different methods, we were able to identify various different isomers of fatty acids. We also detected various fatty acids with odd chain lengths, which have been neglected in the past studies. The information on such atypical fatty acids will shed new light on the mechanism of synthesis of fatty acids in *Chlamydomonas* and other algae. Note that 14:0 and 15:0 are not normally detected in *Chlamydomonas*, but they are useful as internal standards.

## References

1. **Watanabe A.** 1960. List of algal strains in collection at the Institute of Applied Microbiology, University of Tokyo. *J. Gen. Appl. Microbiol.* **6**:283-292.
2. **Bligh EG, Dyer WJ.** 1959. A rapid method of total lipid extraction and purification. *Can. J. of Biochem. and Physiol.* **37**:911-917.
3. **Sato N, Furuya M.** 1983. Isolation and identification of diacylglycerol-*O*-4'-(*N,N,N*-trimethyl)-homoserine from the fern *Adiantum capillusveneris* L. *Plant Cell Physiol.* **24**:1113-1120.
4. **Andersson B, Holman R.** 1974. Pyrrolidides for mass spectrometric determination of the position of the double bond in monounsaturated fatty acids. *Lipids.* **9**:185-190.
5. **Capella P, Zorzut C.** 1968. Determination of double bond position in monounsaturated fatty acids esters by mass spectrometry of their trimethylsilyloxy derivatives. *Anal.*

Chem. **40**:1485-1463.

6. **Janssen G, Parmentier G.** 1978. Determination of double bond positions in fatty acids with conjugated double bonds. Biomed. Mass Spectrom. **5**:439-443.
7. **Janssen G, Parmentier G, Verhulst A, Eyssen H.** 1985. Location of the double bond positions in microbial isomerization and hydrogenation products of  $\alpha$ - and  $\gamma$ -linolenic acids. Biomed. Mass Spectrom. **3**:134-138.

Table1. Retention times of fatty acid methylesters, pyrrolidide derivatives, and trimethylsilyl derivatives on gas chromatography.

| Fatty acid                         | Retention time (min)   |                  |                        |                           |
|------------------------------------|------------------------|------------------|------------------------|---------------------------|
|                                    | Fatty acid methylester |                  | Pyrrolidide derivative | Trimethylsilyl derivative |
|                                    | SS10                   | BPX70            | BPX70                  | Rtx5MS                    |
| 14:0                               | 5.101                  | 7.145            | 14.425                 |                           |
| 15:0                               | 5.683                  | 8.000            | 16.070                 |                           |
| 16:0                               | 6.434                  | 9.085            | 18.035                 |                           |
| 16:1(7)                            | 6.733                  | 9.485            | 19.035                 | 13.550<br>13.740          |
| 16:1(3t)                           | 6.698                  | 9.480            | 20.405                 | 14.635                    |
| 16:1(9)                            | 6.808                  | 9.595            | 19.535                 | 13.830                    |
| 16:1(11)                           | 6.949                  | 9.675            | 19.950                 | 14.145                    |
| 16:2(7,10)                         | 7.320                  | 10.275           | 20.935                 | 16.670                    |
| 16:3(4,7,10)                       | 7.597                  | 10.615           | 22.460                 | 19.540                    |
| 16:3(7,10,13)                      | 8.113                  | 11.345           | 23.660                 | 20.220                    |
| 16:4(4,7,10,13)                    | 8.407                  | 11.745           | 24.125                 | 23.420                    |
| 17:0                               | 7.264                  | 10.210           | 20.335                 |                           |
| 17:1(8)<br>17:1(9)                 | 7.681                  | 10.800           | 21.850                 | 14.435<br>14.865          |
| 17:1(10)<br>17:1(11)               | 7.681                  | 10.800           | 21.925                 | 14.545<br>15.060          |
| 18:0                               | 8.273                  | 11.545           | 23.120                 |                           |
| 18:1(9)                            | 8.735                  | 12.145           | 24.865                 | 15.910                    |
| 18:1(11)<br>18:1(13)               | 8.829<br>8.976         | 12.265<br>12.450 | 25.380                 | 16.025<br>16.340          |
| 18:2(9,12)                         | 9.553                  | 13.165           | 28.255                 | 18.605                    |
| 18:3(5,9,12)                       | 9.956                  | 13.630           | 28.820                 | 21.250                    |
| 18:3(9,12,15)                      | 10.575                 | 14.365           | 32.240                 | 21.835<br>21.930          |
| 18:4(5,9,12,15)<br>18:4(6,9,12,15) | 10.994                 | 14.850           | 32.255<br>32.300       | 24.870<br>24.815          |
| 19:0                               | 9.390                  | 12.985           | 26.090                 |                           |
| 19:1(10)<br>19:1(13)               | 9.774                  | 13.690           | 28.975                 | 16.555<br>16.480          |
| 20:1(11)                           | 11.237                 | 15.210           | 25.380                 | 17.930                    |
| 22:1(13)                           |                        | 18.515           | 40.590                 | 19.865                    |

Table2. Molecular weights of fatty acid methylesters, pyrrolidide derivatives, and trimethylsilyl derivatives.

| Fatty acid      | Molecular weight       |                        |                           |
|-----------------|------------------------|------------------------|---------------------------|
|                 | Fatty acid methylester | Pyrrolidide derivative | Trimethylsilyl derivative |
| 14:0            | 242                    | 281                    | 242                       |
| 15:0            | 256                    | 295                    | 256                       |
| 16:0            | 270                    | 309                    | 270                       |
| 16:1(7)         | 268                    | 307                    | 446                       |
| 16:1(3t)        | 268                    | 307                    | 446                       |
| 16:1(9)         | 268                    | 307                    | 446                       |
| 16:1(11)        | 268                    | 307                    | 446                       |
| 16:2(7,10)      | 266                    | 305                    | 622                       |
| 16:3(4,7,10)    | 264                    | 303                    | 798                       |
| 16:3(7,10,13)   | 264                    | 303                    | 798                       |
| 16:4(4,7,10,13) | 262                    | 301                    | 974                       |
| 17:0            | 284                    | 323                    | 284                       |
| 17:1(8)         | 282                    | 321                    | 460                       |
| 17:1(9)         | 282                    | 321                    | 460                       |
| 17:1(10)        | 282                    | 321                    | 460                       |
| 17:1(11)        | 282                    | 321                    | 460                       |
| 18:0            | 298                    | 337                    | 298                       |
| 18:1(9)         | 296                    | 335                    | 474                       |
| 18:1(11)        | 296                    | 335                    | 474                       |
| 18:1(13)        | 296                    | 335                    | 474                       |
| 18:2(9,12)      | 294                    | 333                    | 650                       |
| 18:3(5,9,12)    | 292                    | 331                    | 826                       |
| 18:3(9,12,15)   | 292                    | 331                    | 826                       |
| 18:4(5,9,12,15) | 290                    | 329                    | 1002                      |
| 18:4(6,9,12,15) | 290                    | 329                    | 1002                      |
| 19:0            | 312                    | 351                    | 312                       |
| 19:1(10)        | 310                    | 349                    | 488                       |
| 19:1(13)        | 310                    | 349                    | 488                       |
| 20:1(11)        | 324                    | 363                    | 502                       |
| 22:1(13)        | 352                    | 391                    | 530                       |

Trimethylsilyl derivative

16:1 (7)

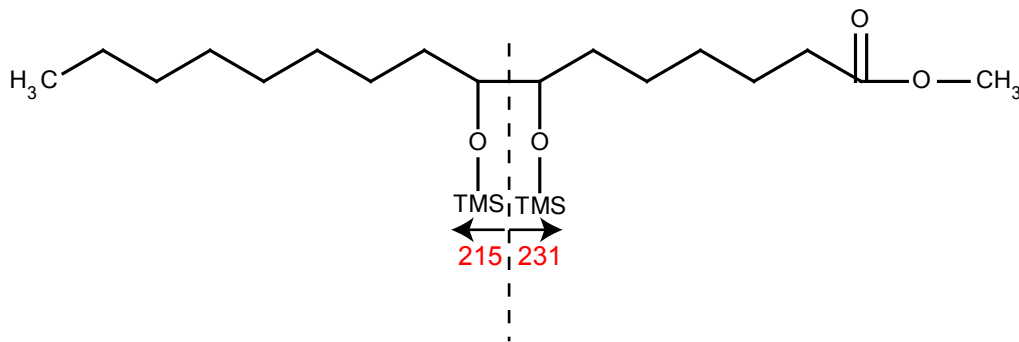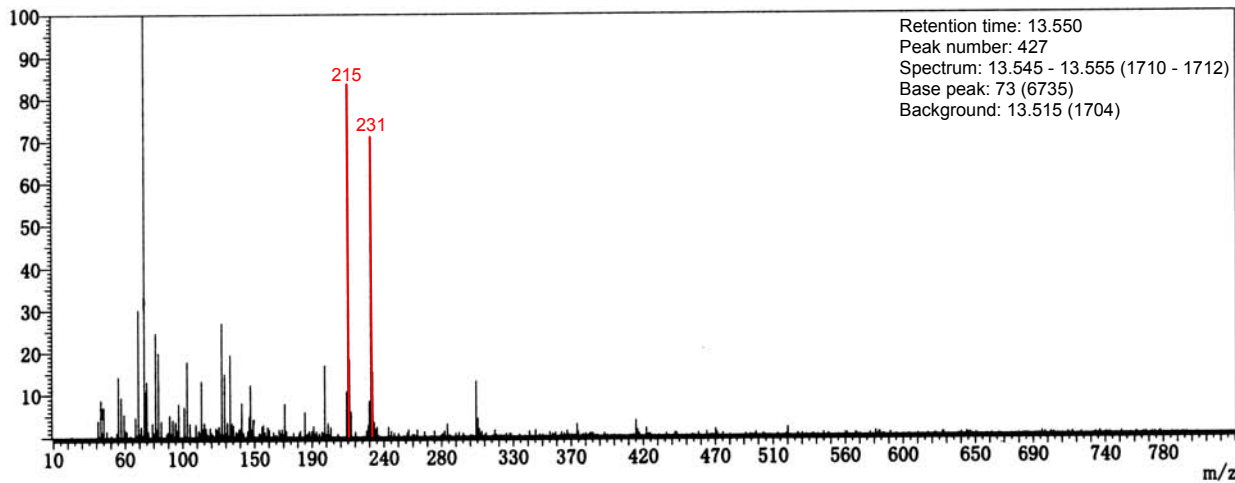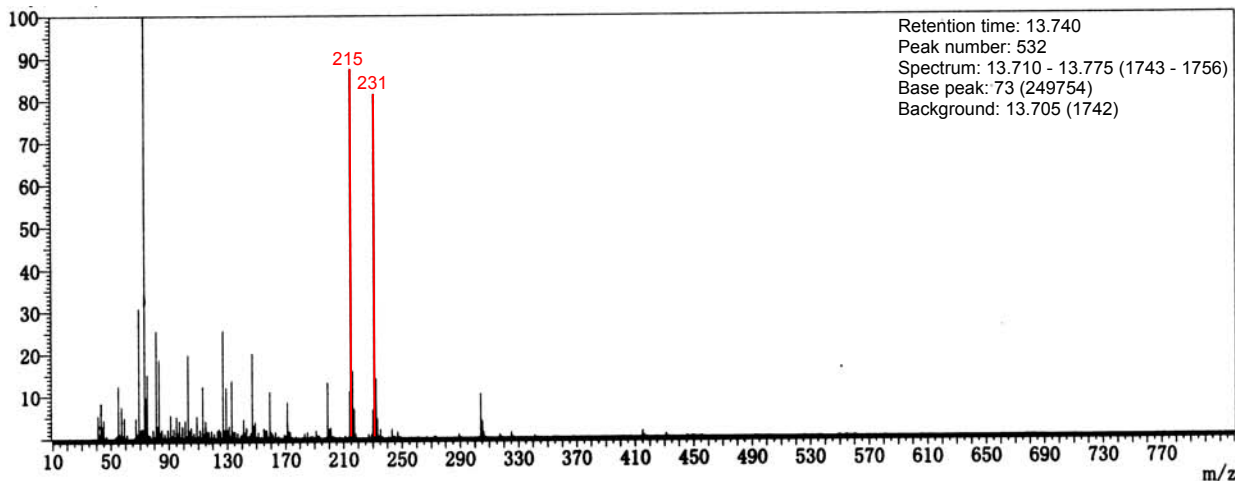

Pyrrolidide derivative

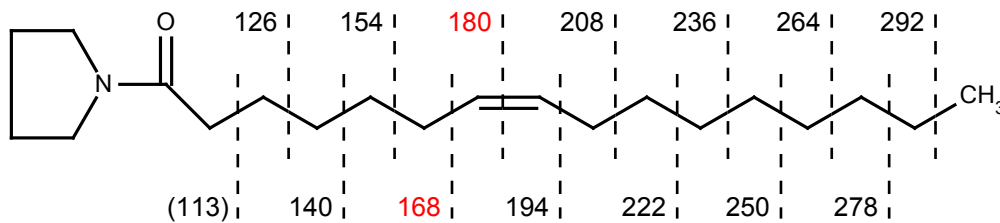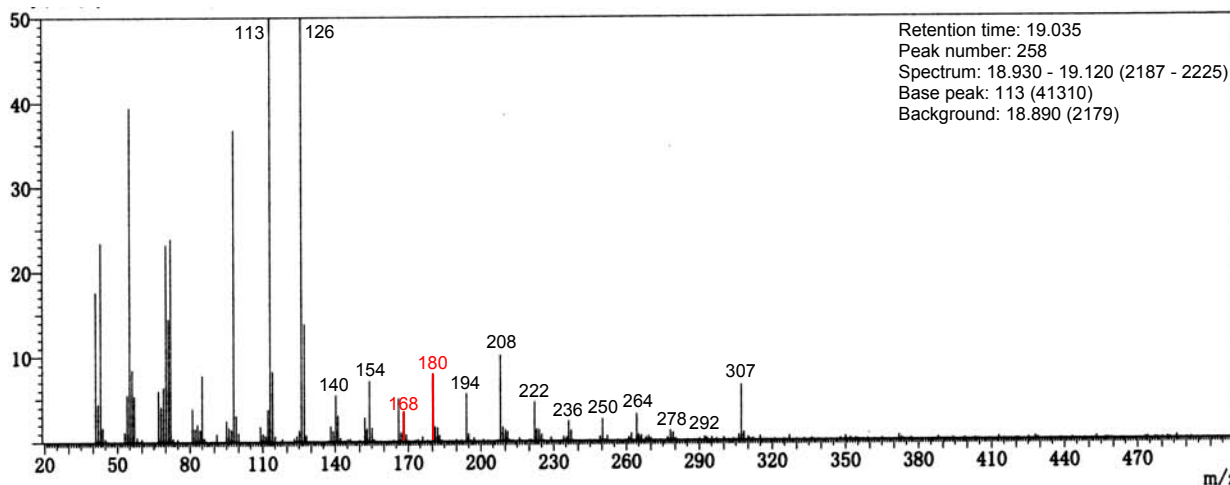

## Trimethylsilyl derivative

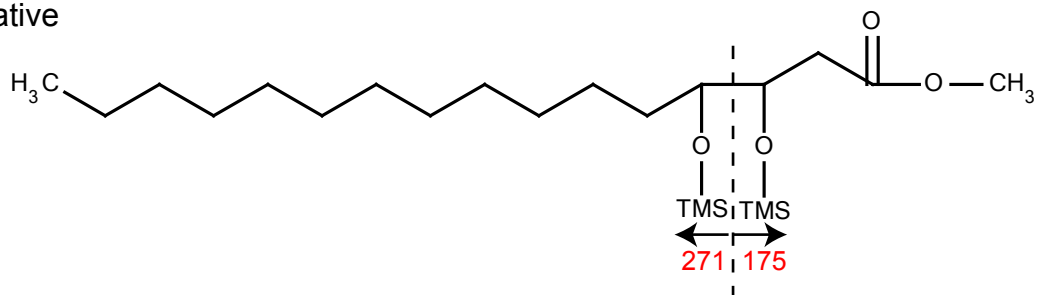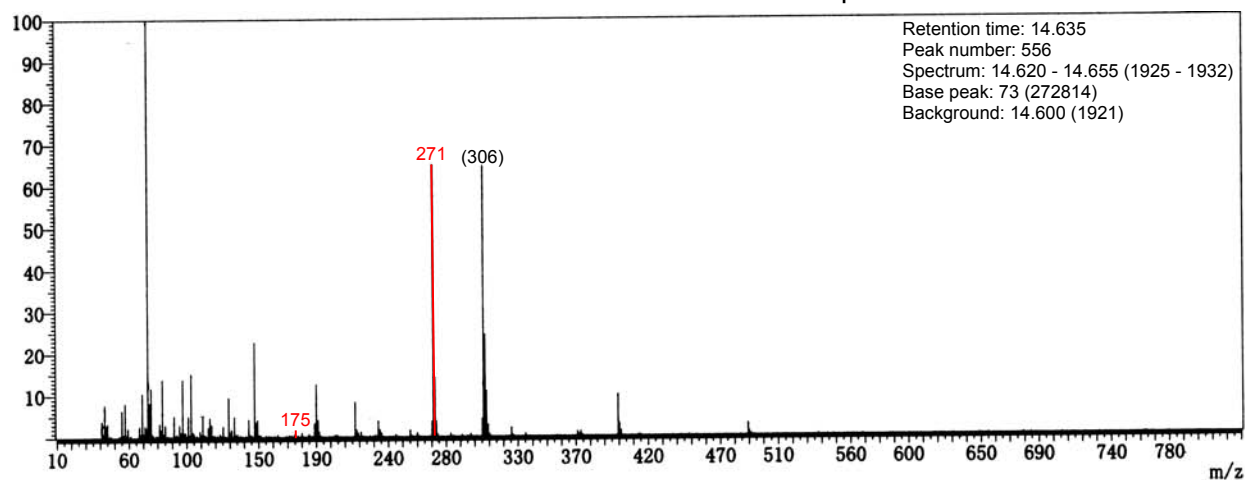

## Pyrrolidide derivative

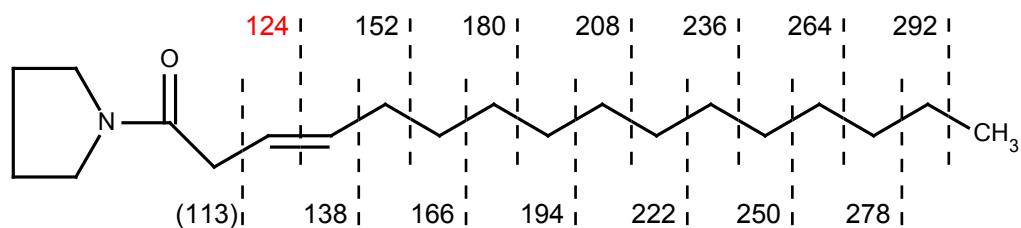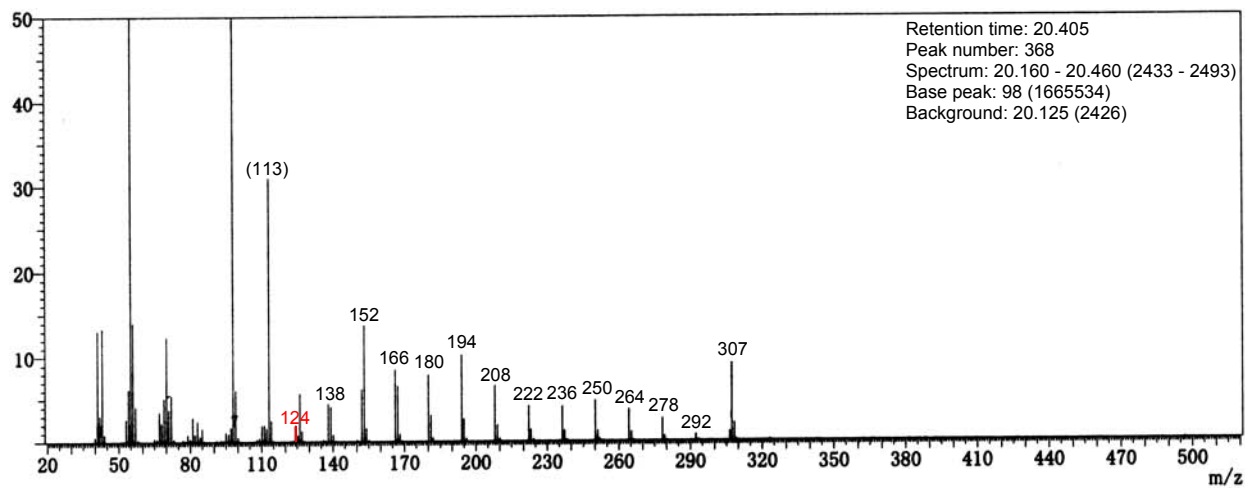

## Trimethylsilyl derivative

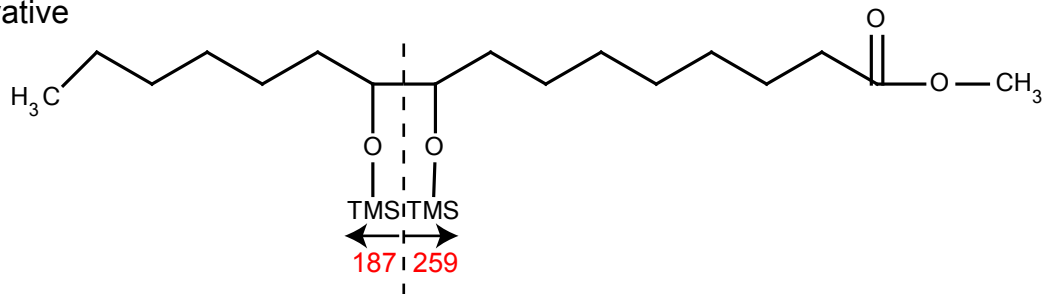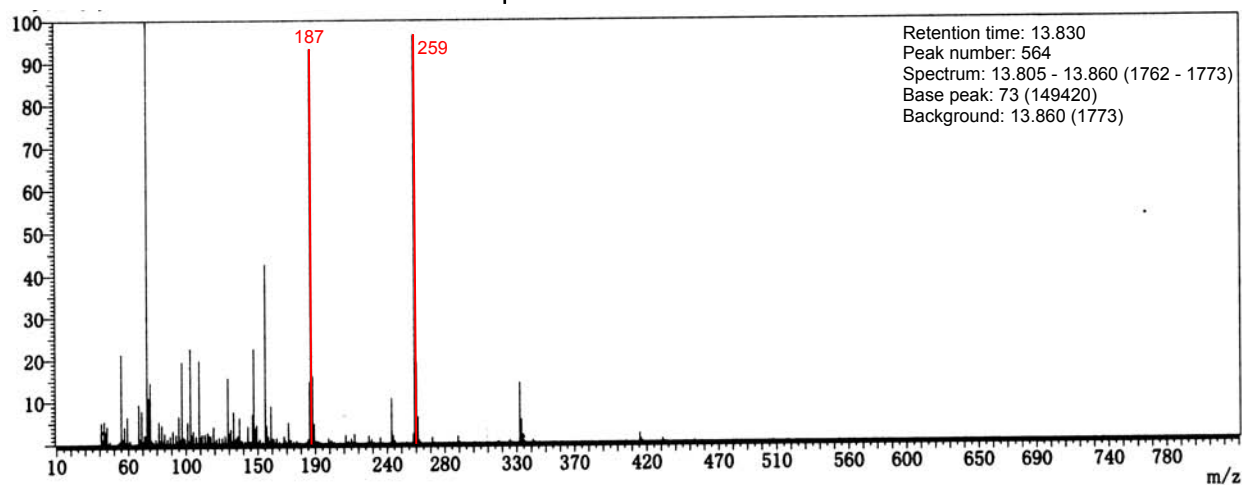

## Pyrrolidide derivative

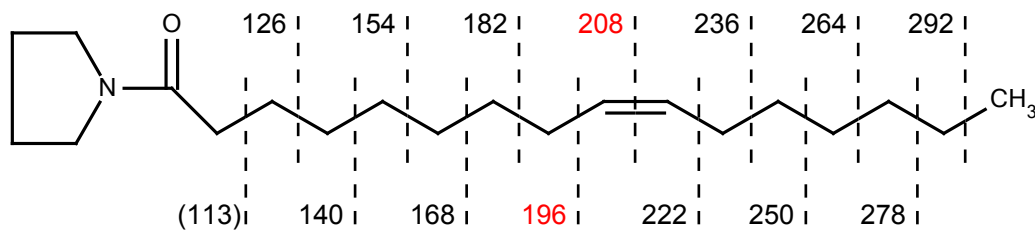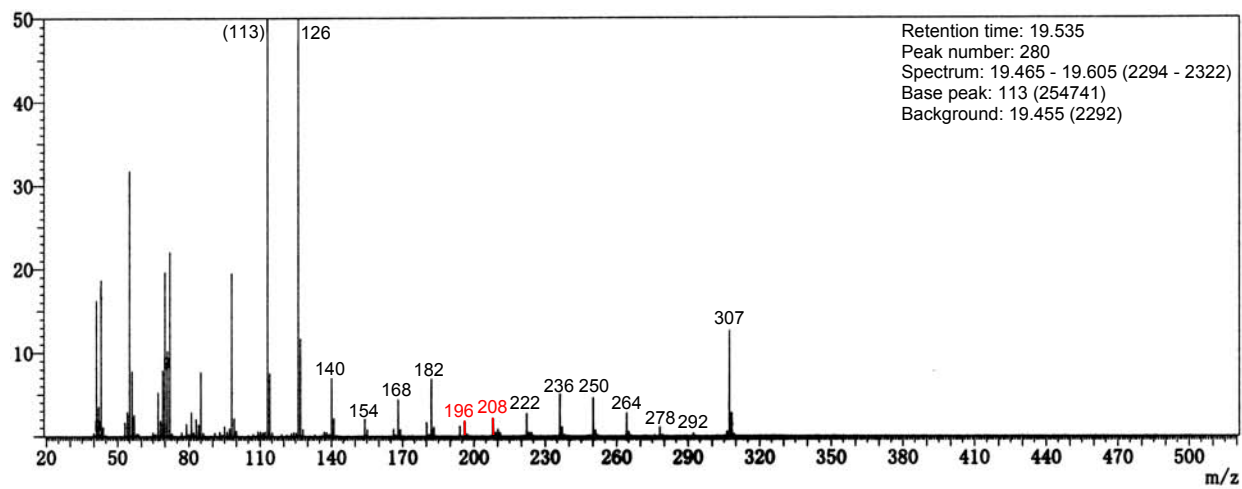

## Trimethylsilyl derivative

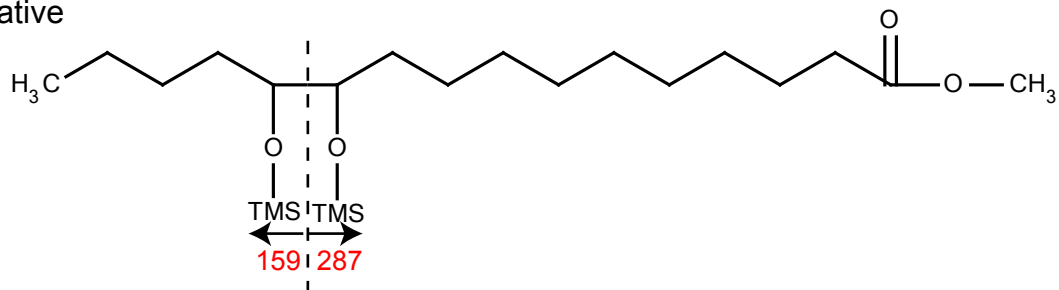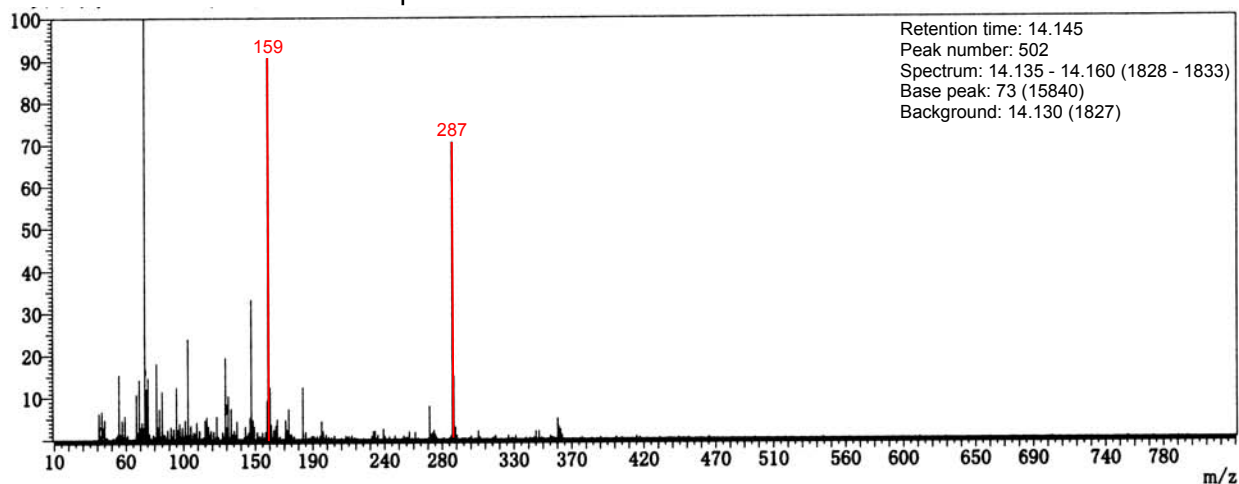

## Pyrrolidide derivative

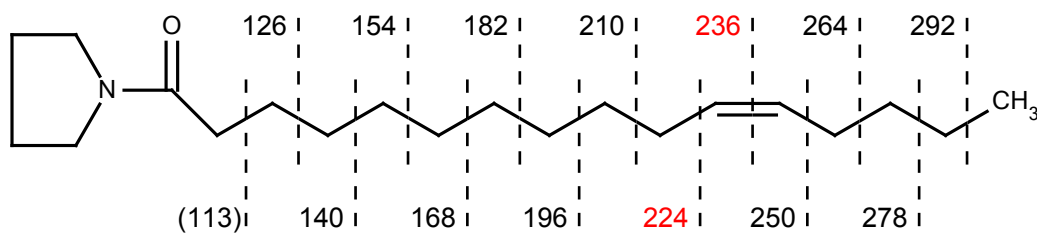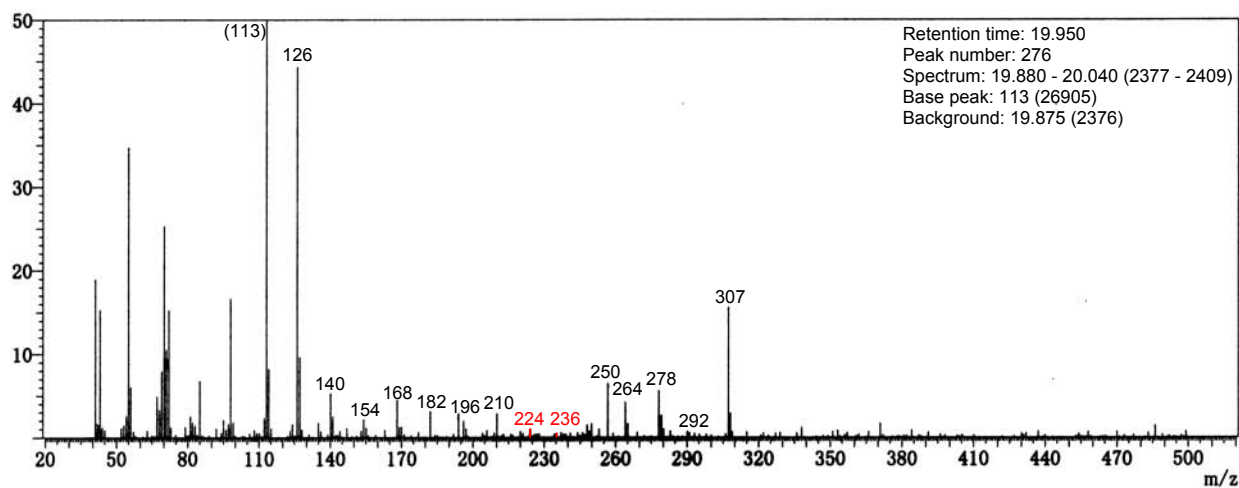



Trimethylsilyl derivative

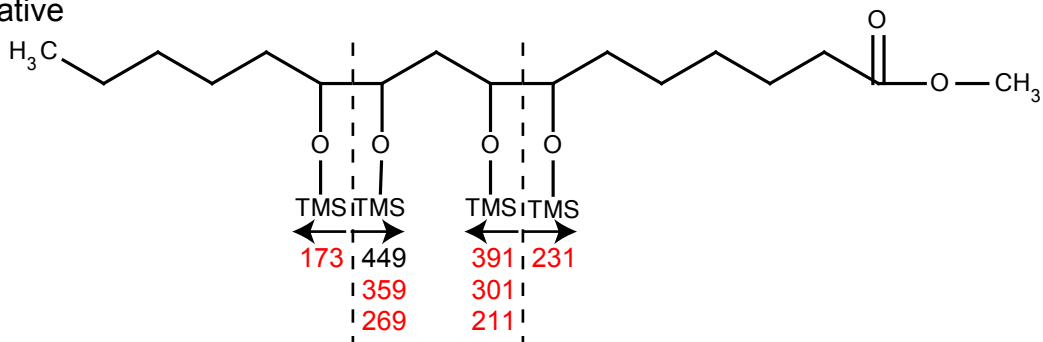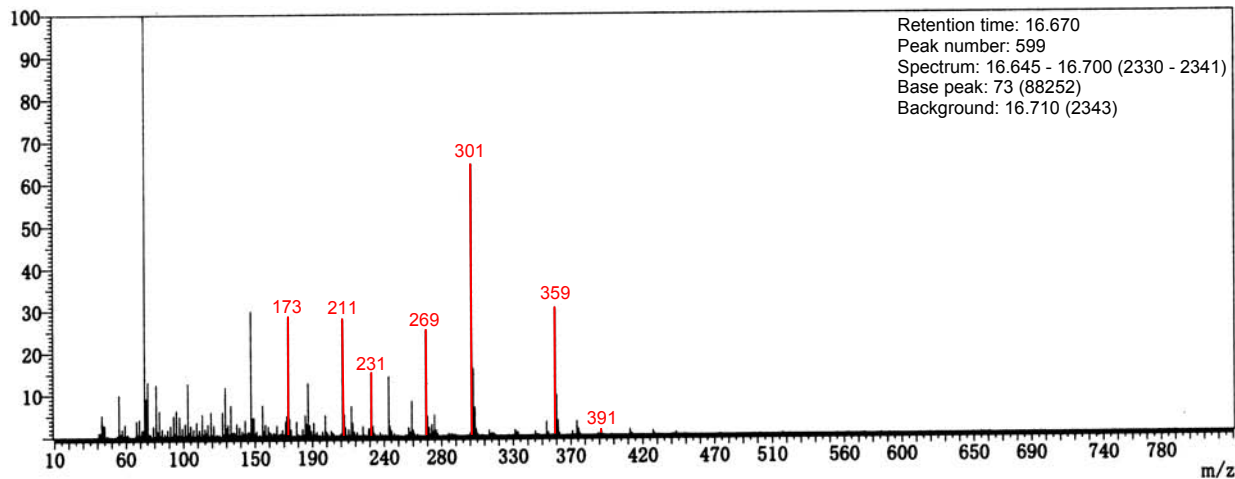

Pyrrolidide derivative

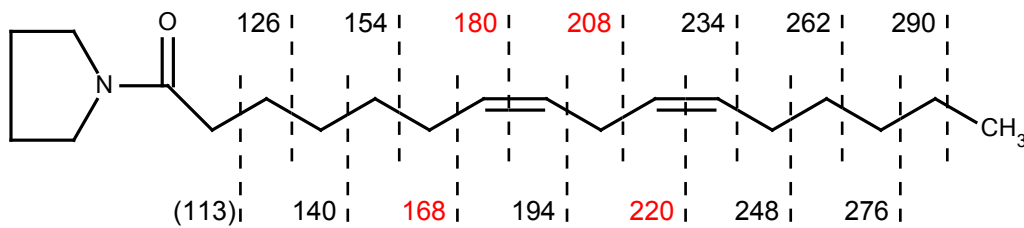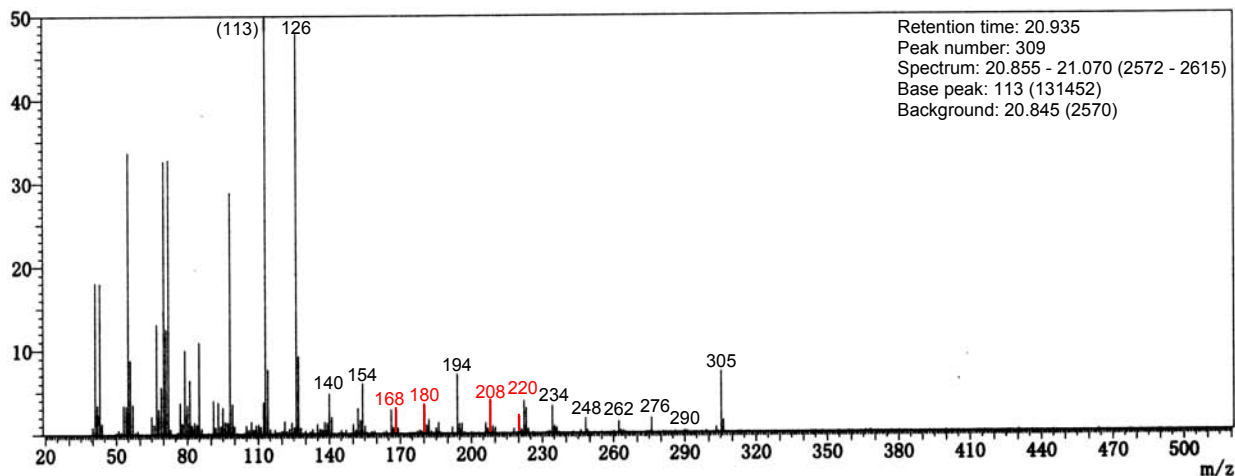

Trimethylsilyl derivative

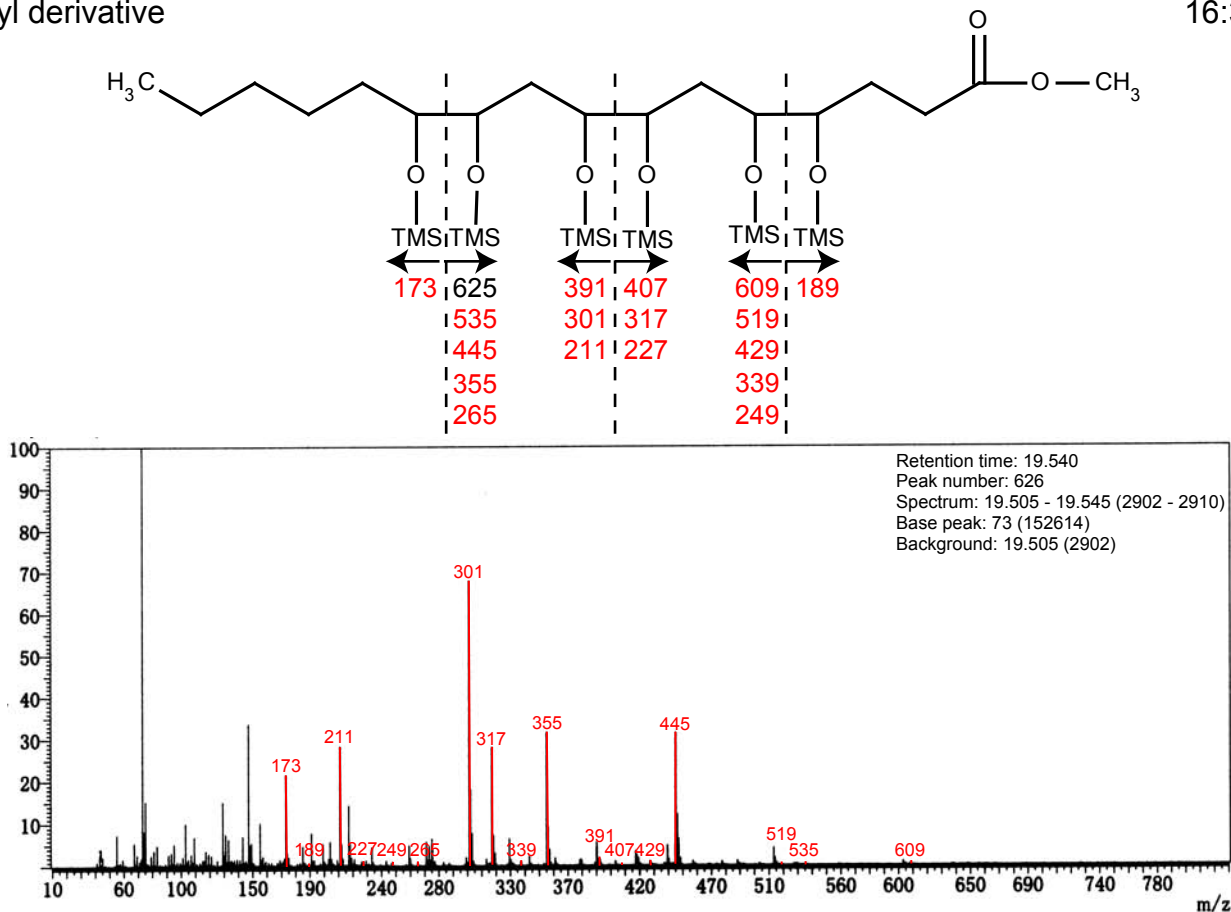

Pyrrolidide derivative

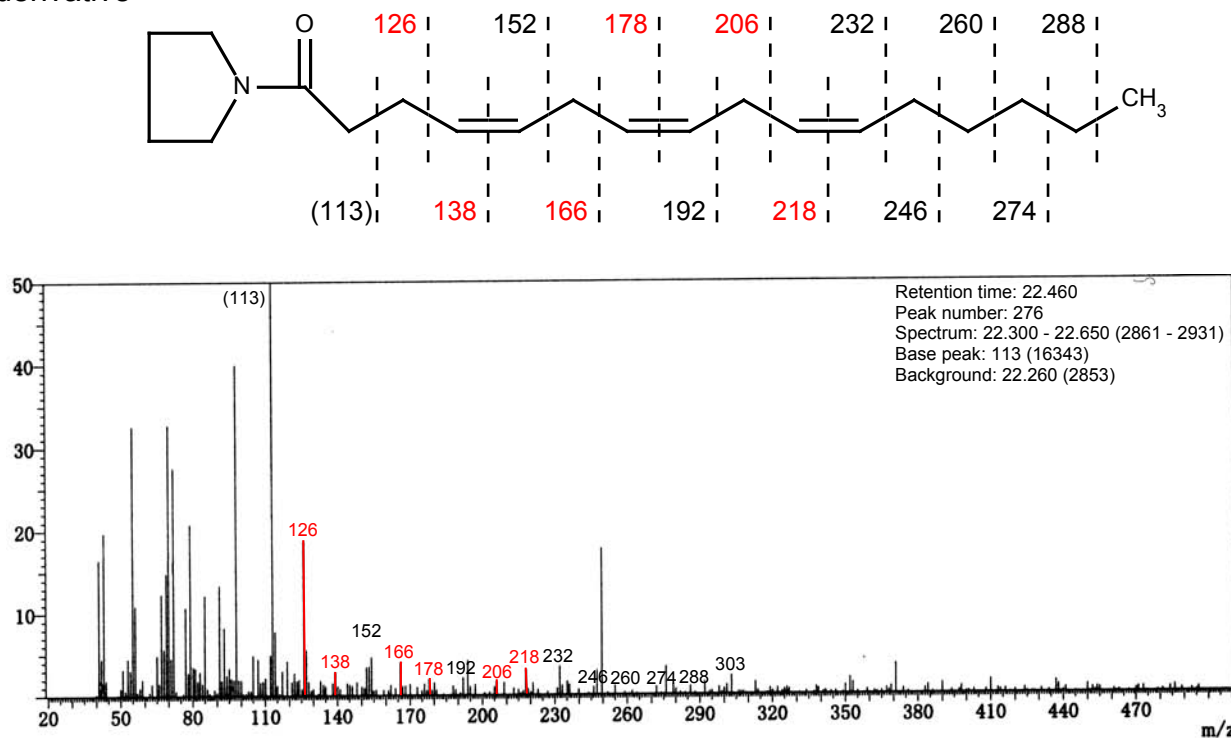

## Trimethylsilyl derivative

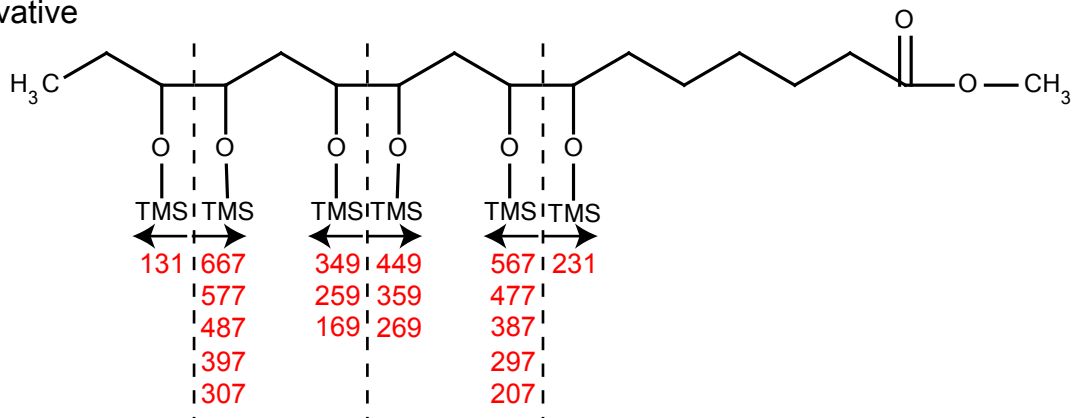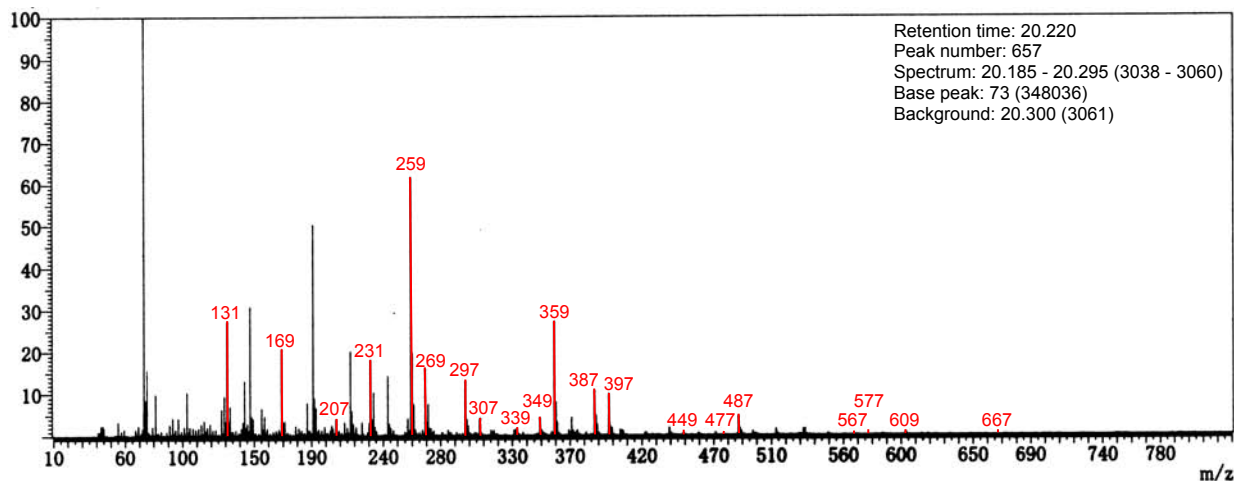

## Pyrrolidide derivative

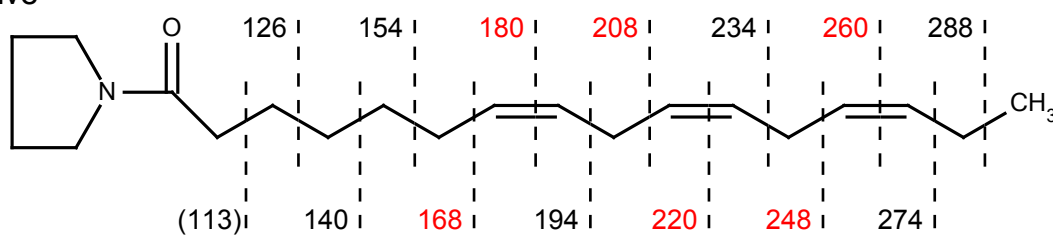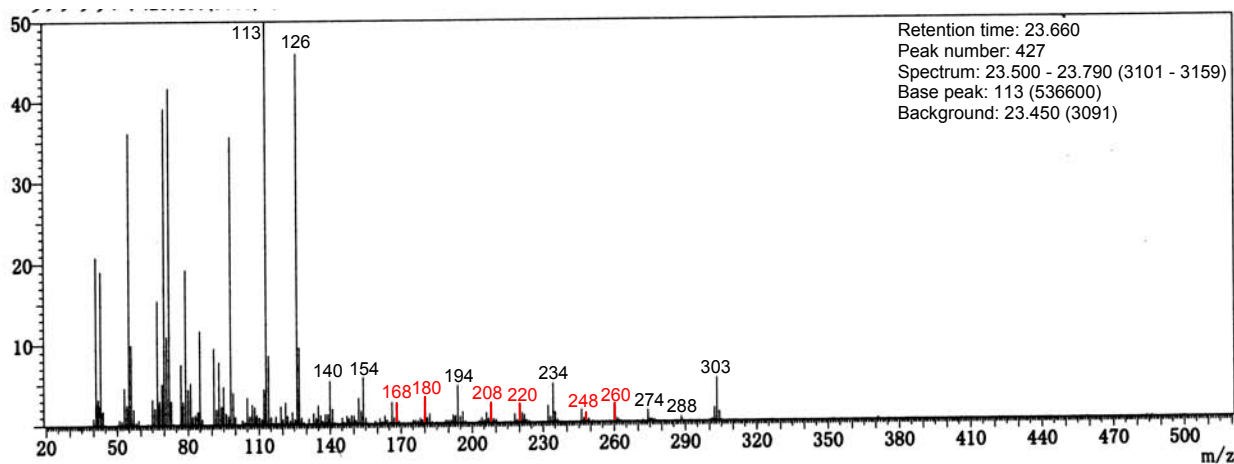

## Trimethylsilyl derivative

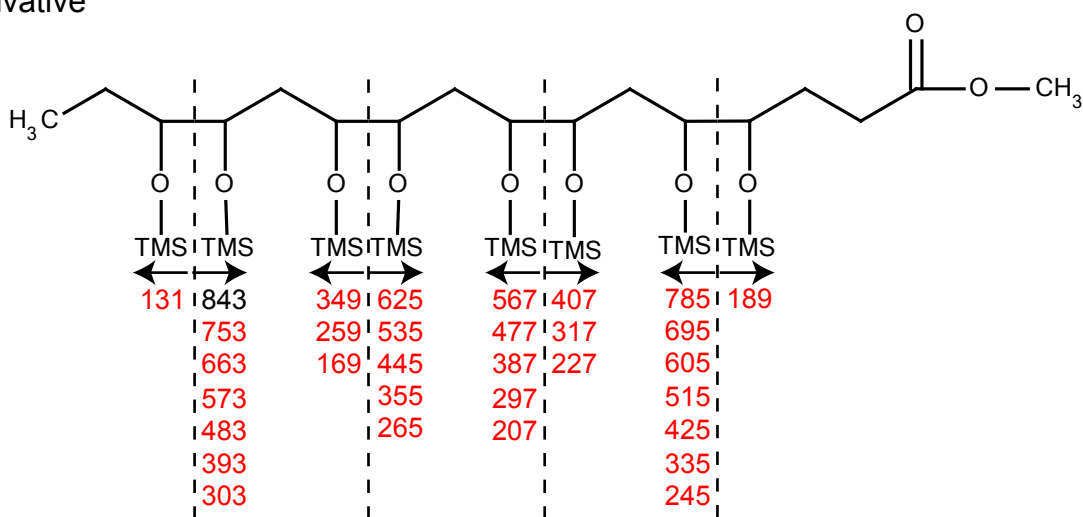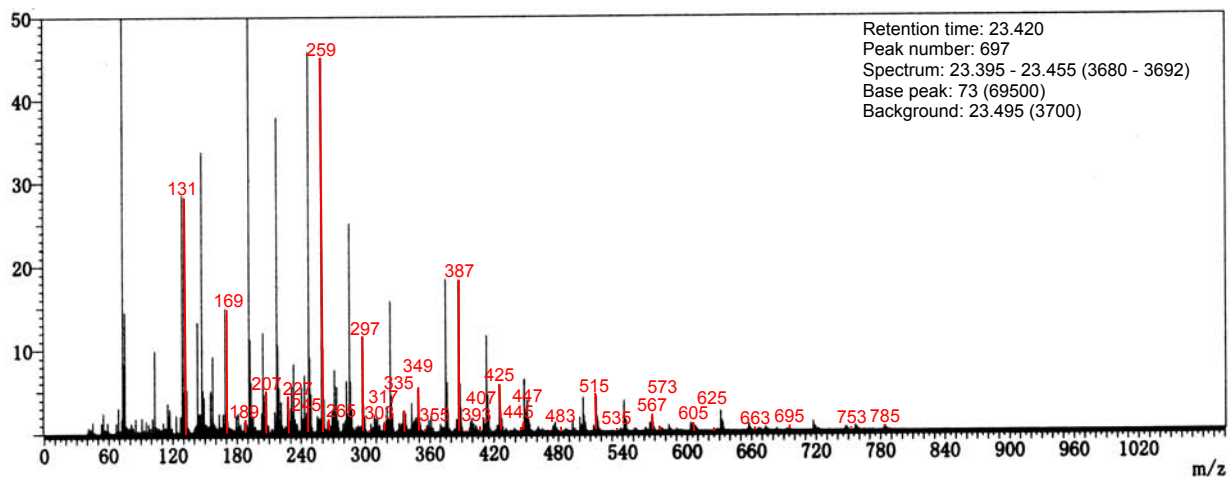

## Pyrrolidide derivative

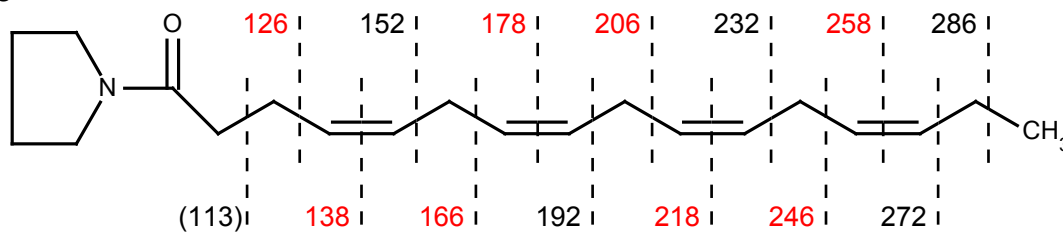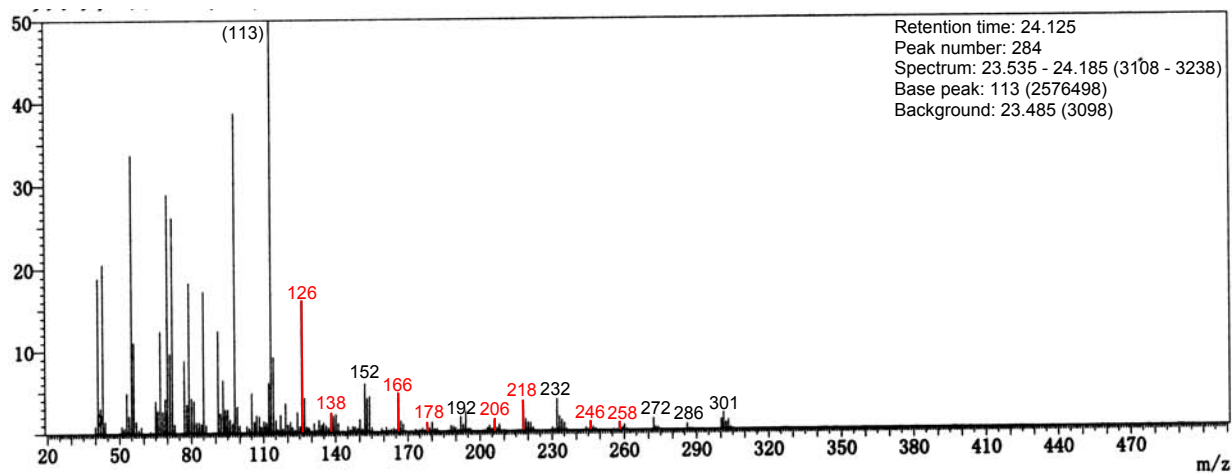

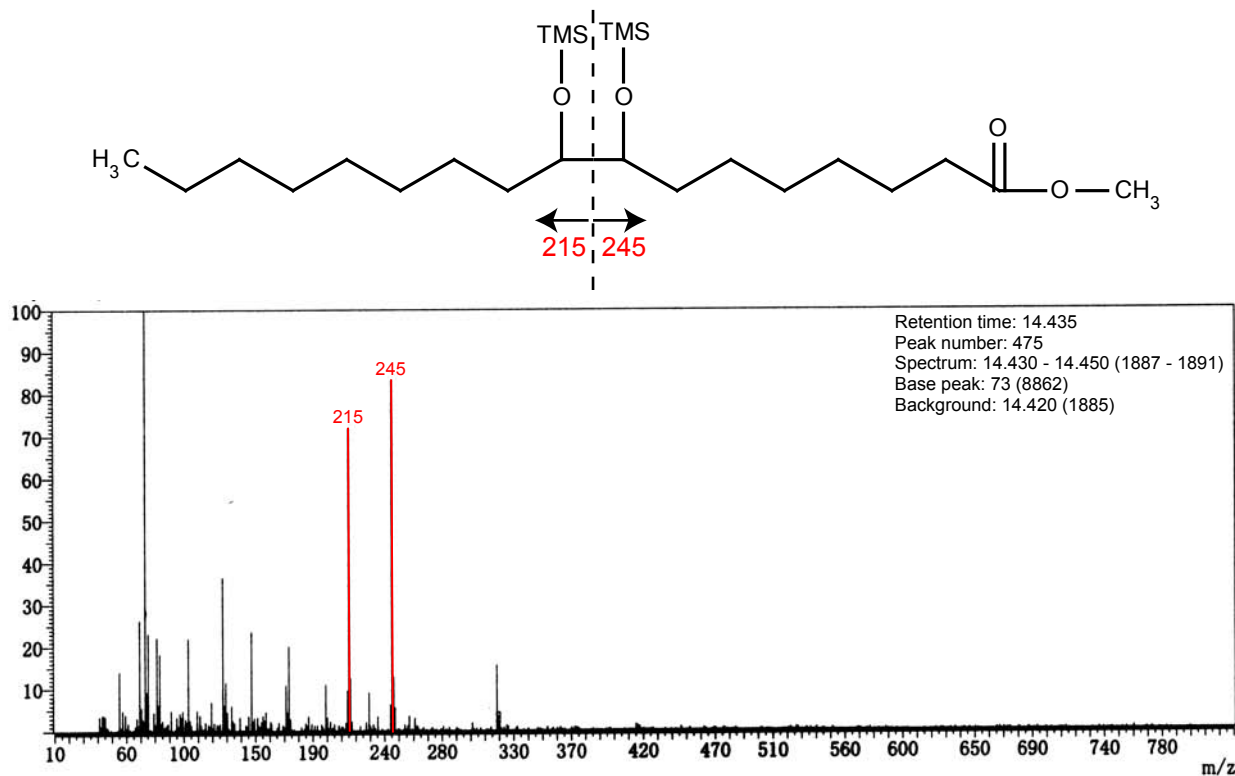

Pyrrolidide derivative

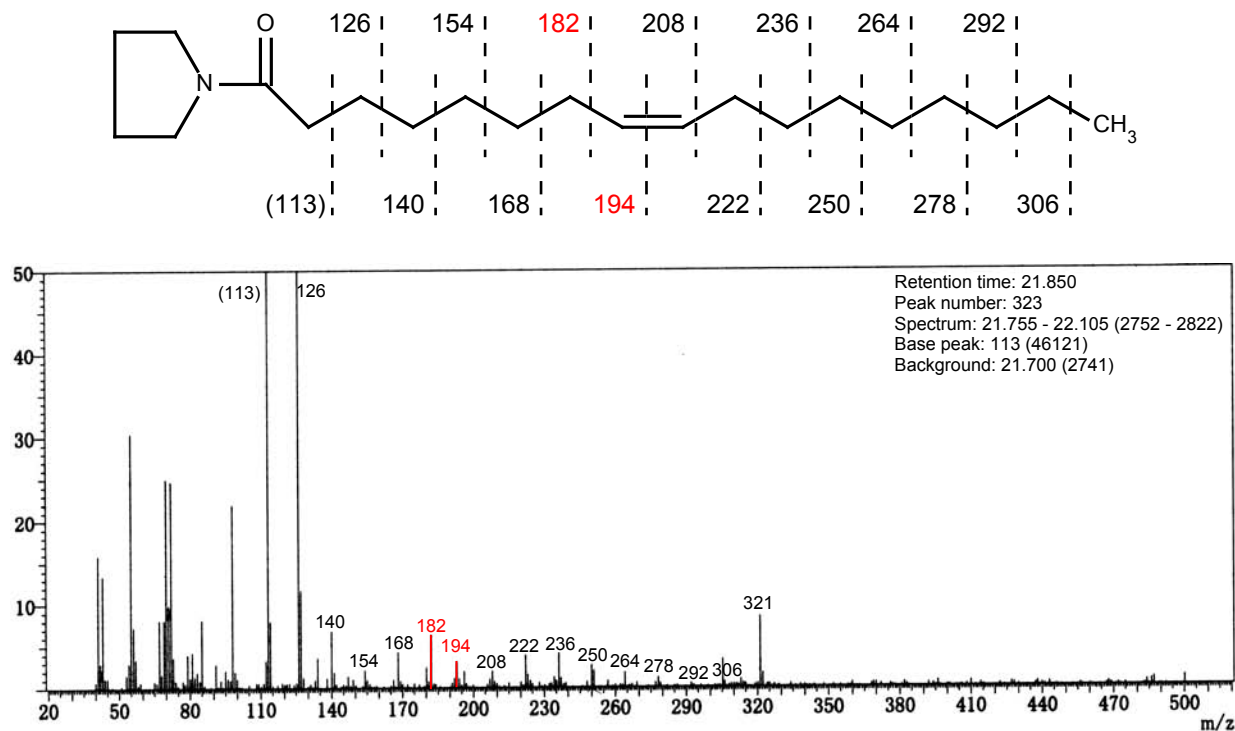

In the pyrrolidide derivatives of 17:1(8) and 17:1(9), the mass spectrum of these pyrrolidide derivatives was obtained from the same peak of gas chromatogram.

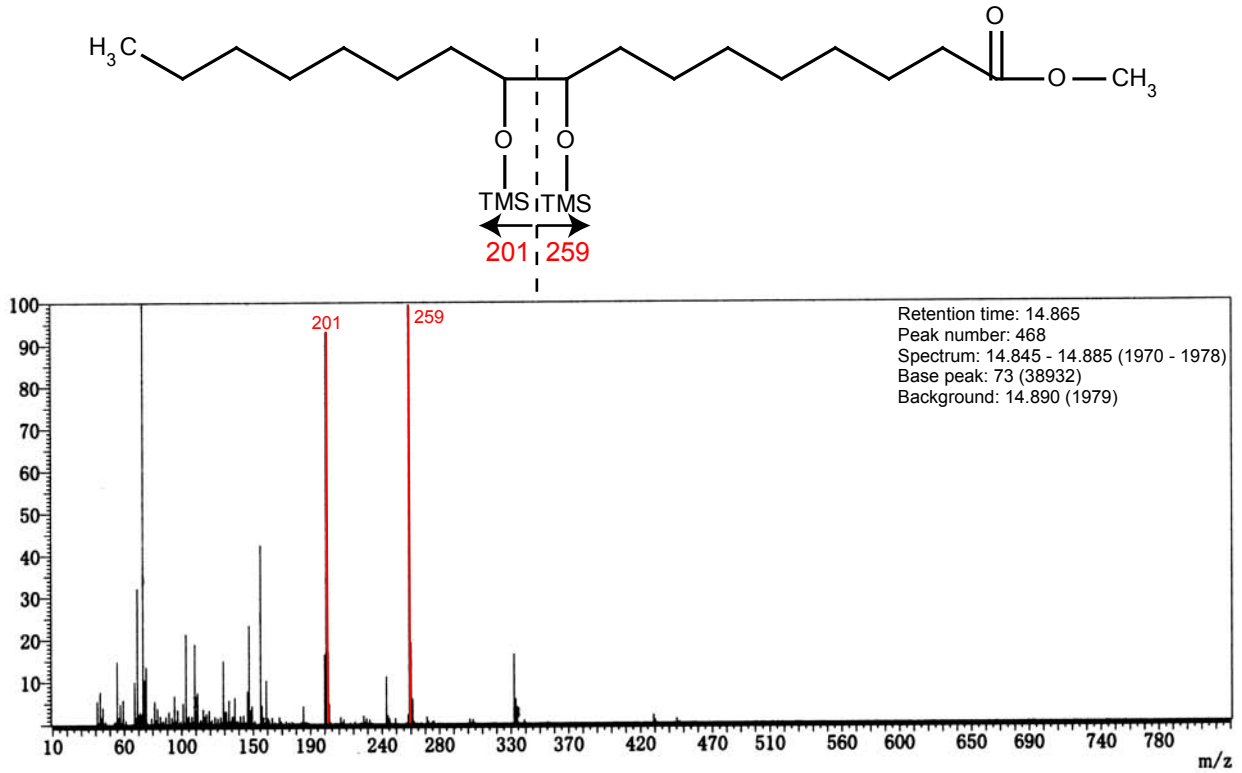

Pyrrolidide derivative

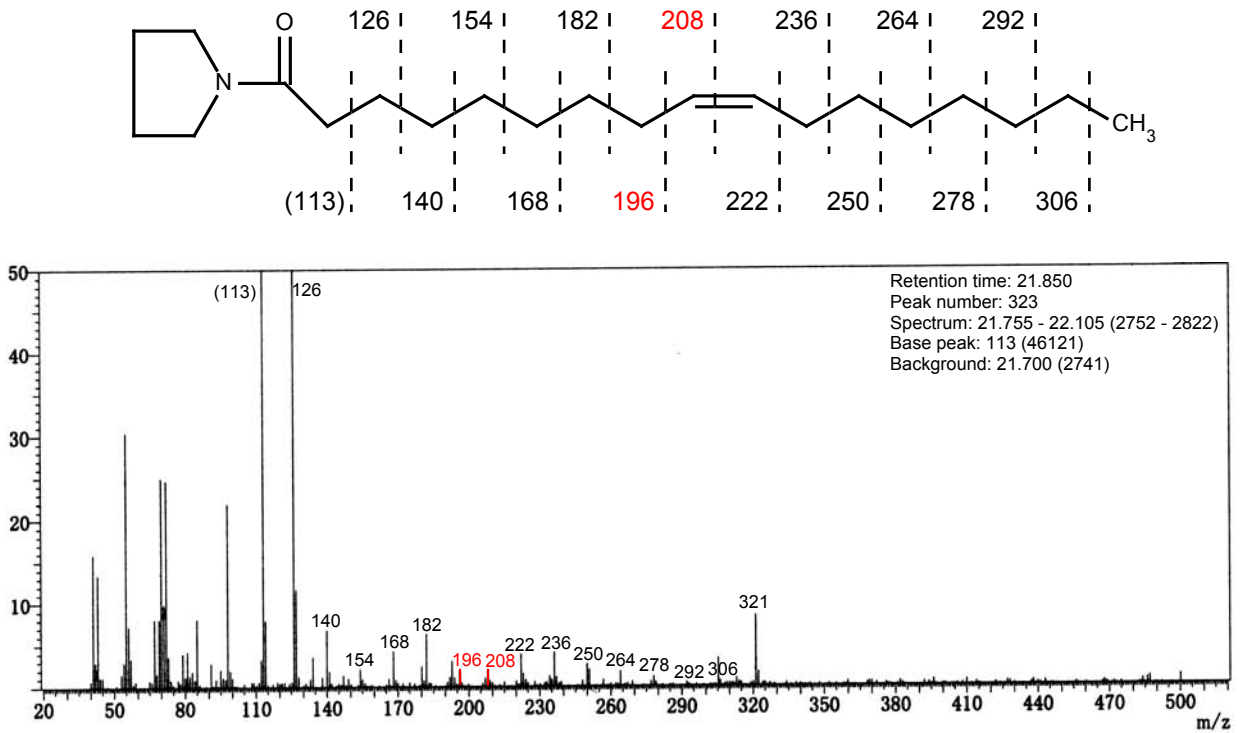

In the pyrrolidide derivatives of 17:1(8) and 17:1(9), the mass spectrum of these pyrrolidide derivatives was obtained from the same peak of gas chromatogram.

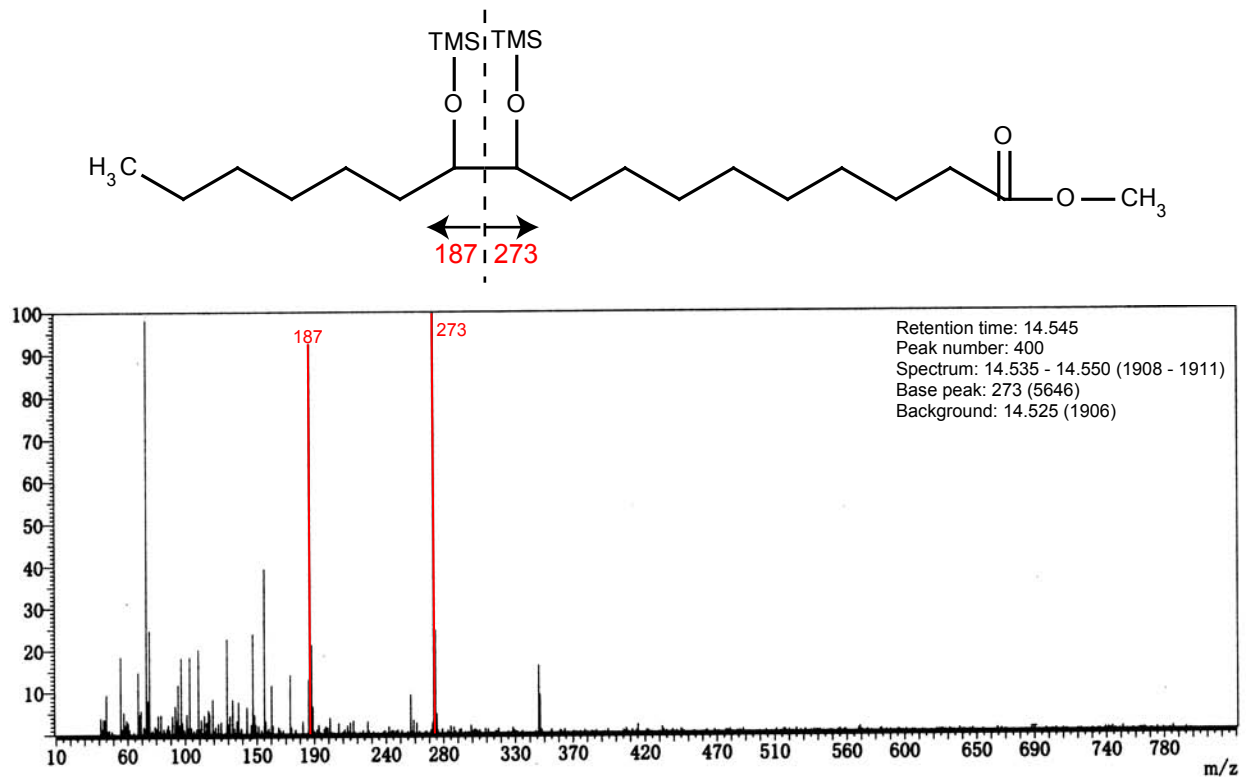

Pyrrolidide derivative

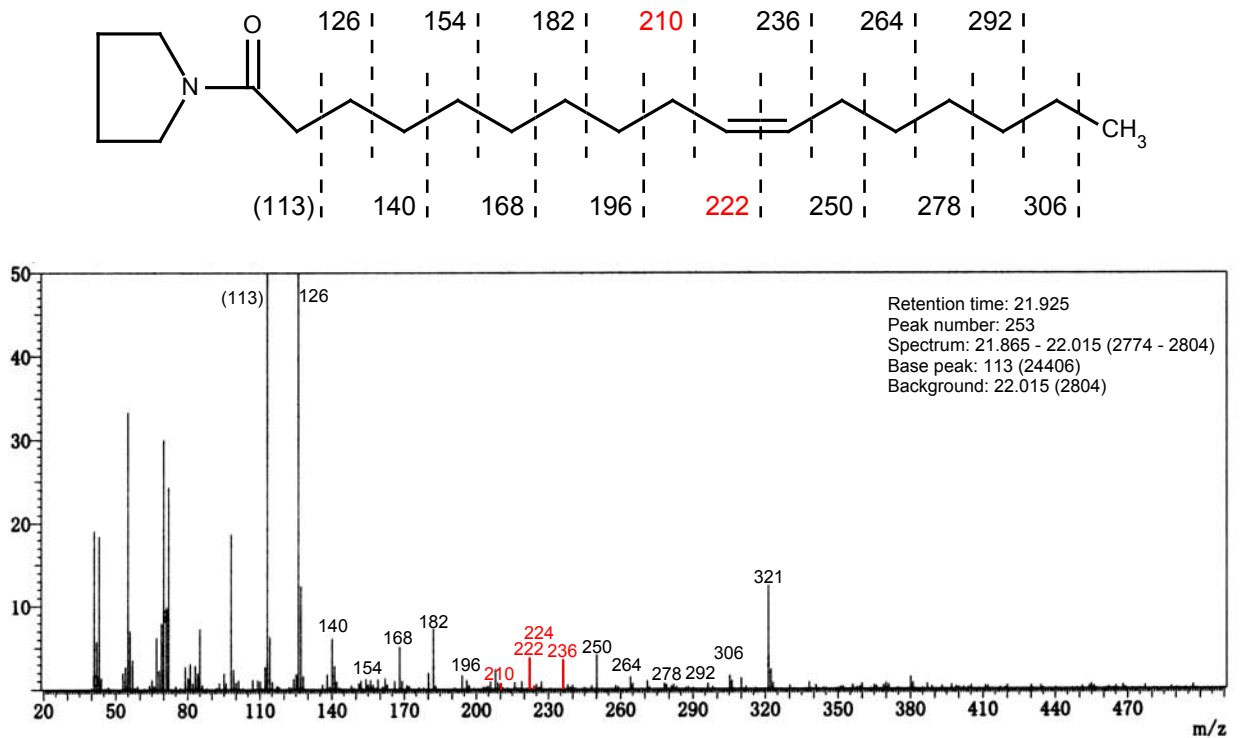

In the pyrrolidide derivatives of 17:1(10) and 17:1(11), the mass spectrum of these pyrrolidide derivatives was obtained from the same peak of gas chromatogram.

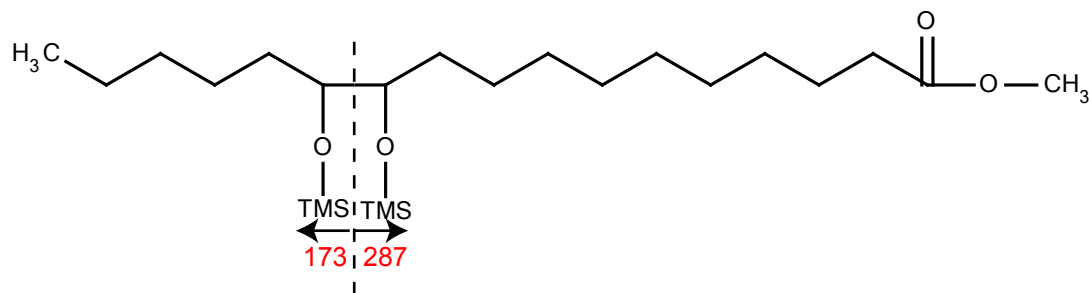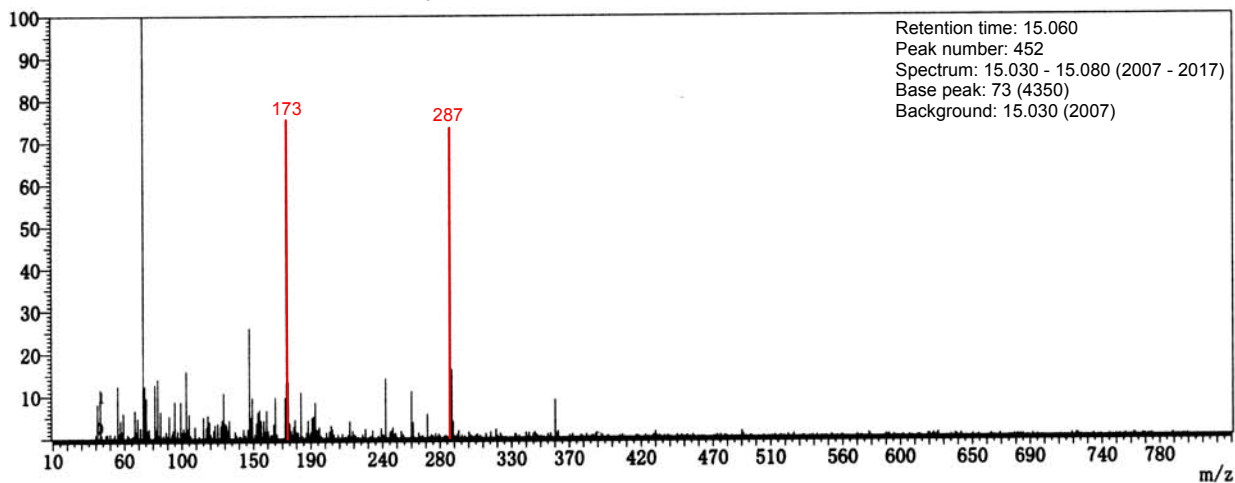

Pyrrolidide derivative

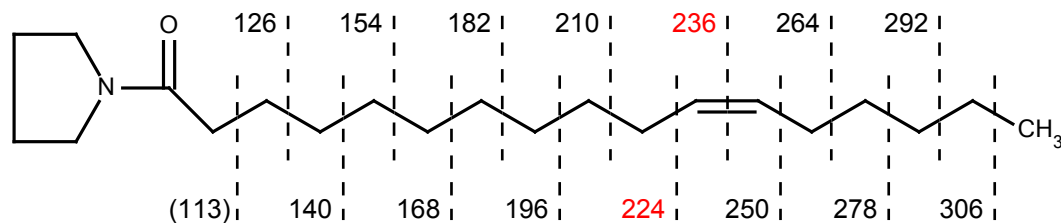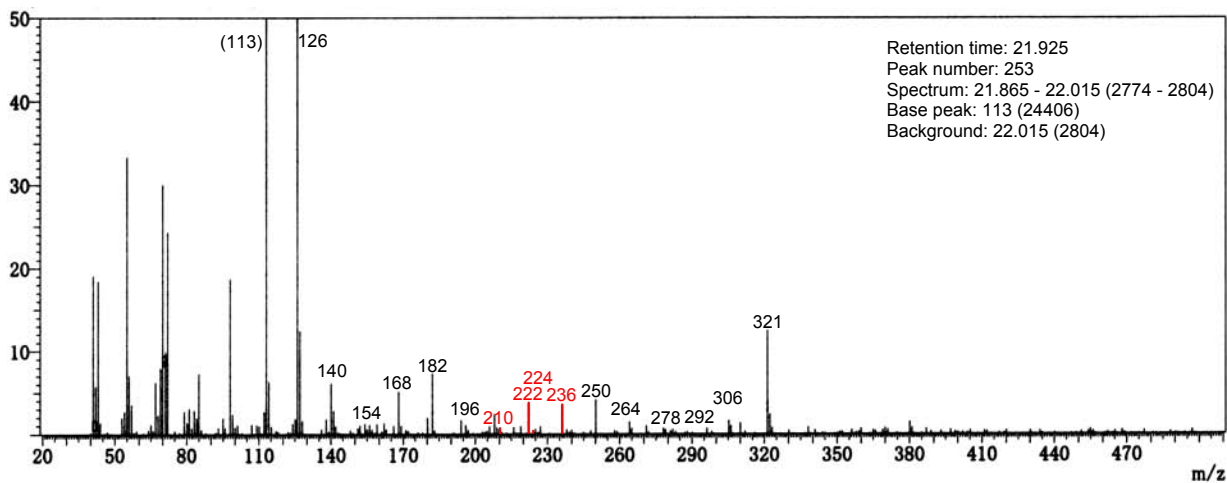

In the pyrrolidide derivatives of 17:1(10) and 17:1(11), the mass spectrum of these pyrrolidide derivatives was obtained from the same peak of gas chromatogram.



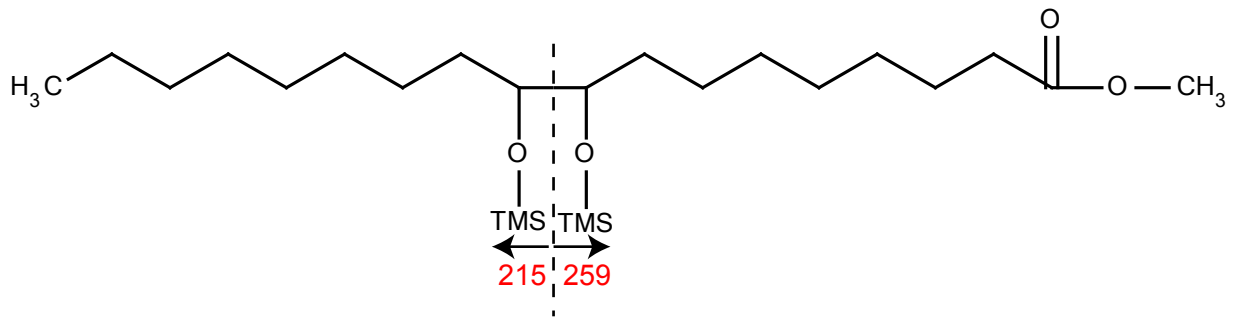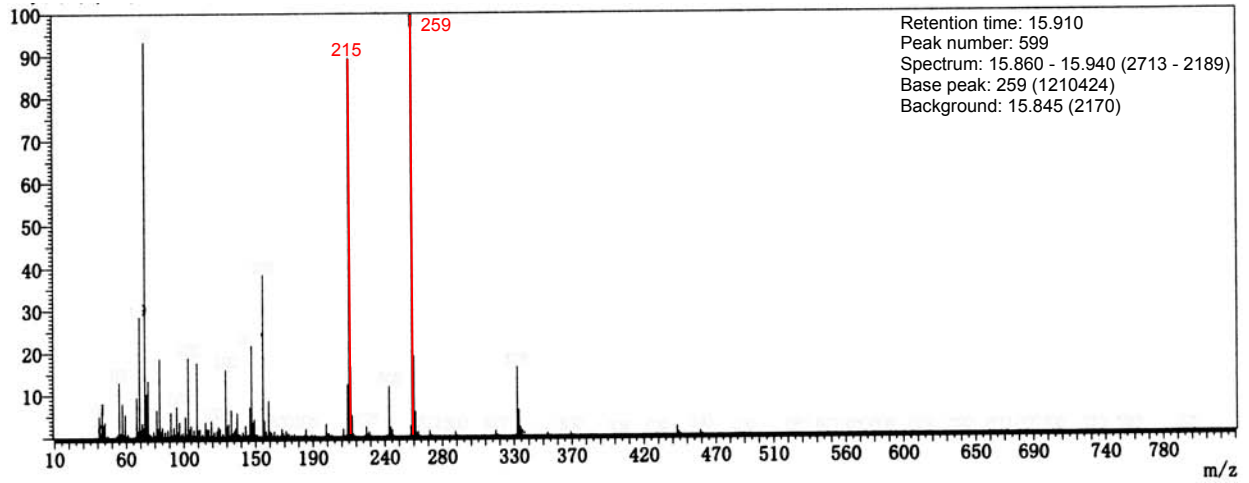

Pyrrolidide derivative

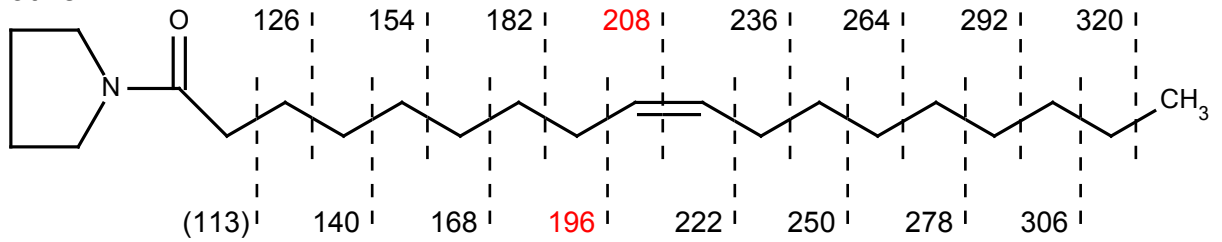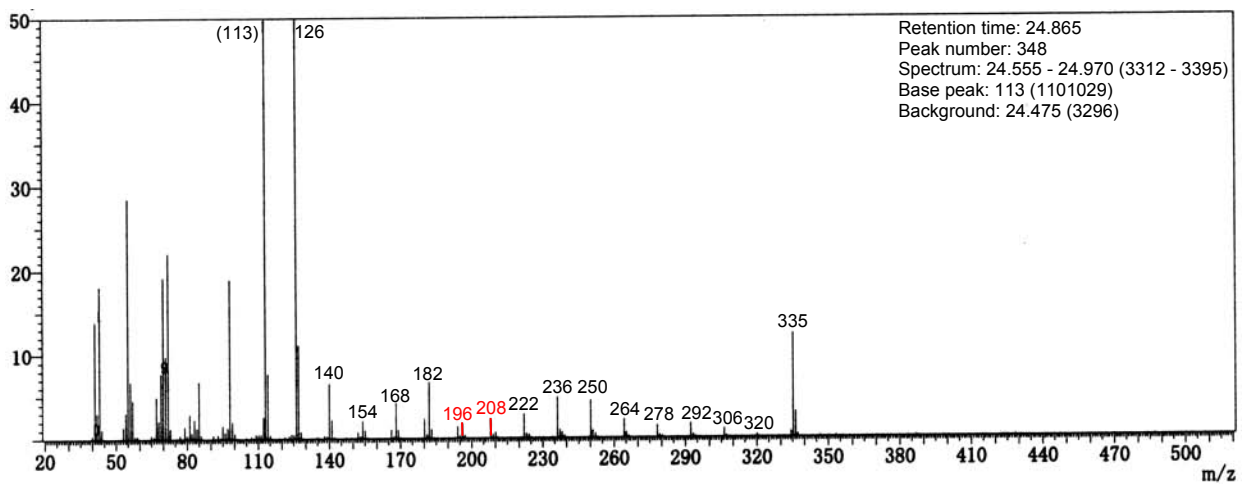

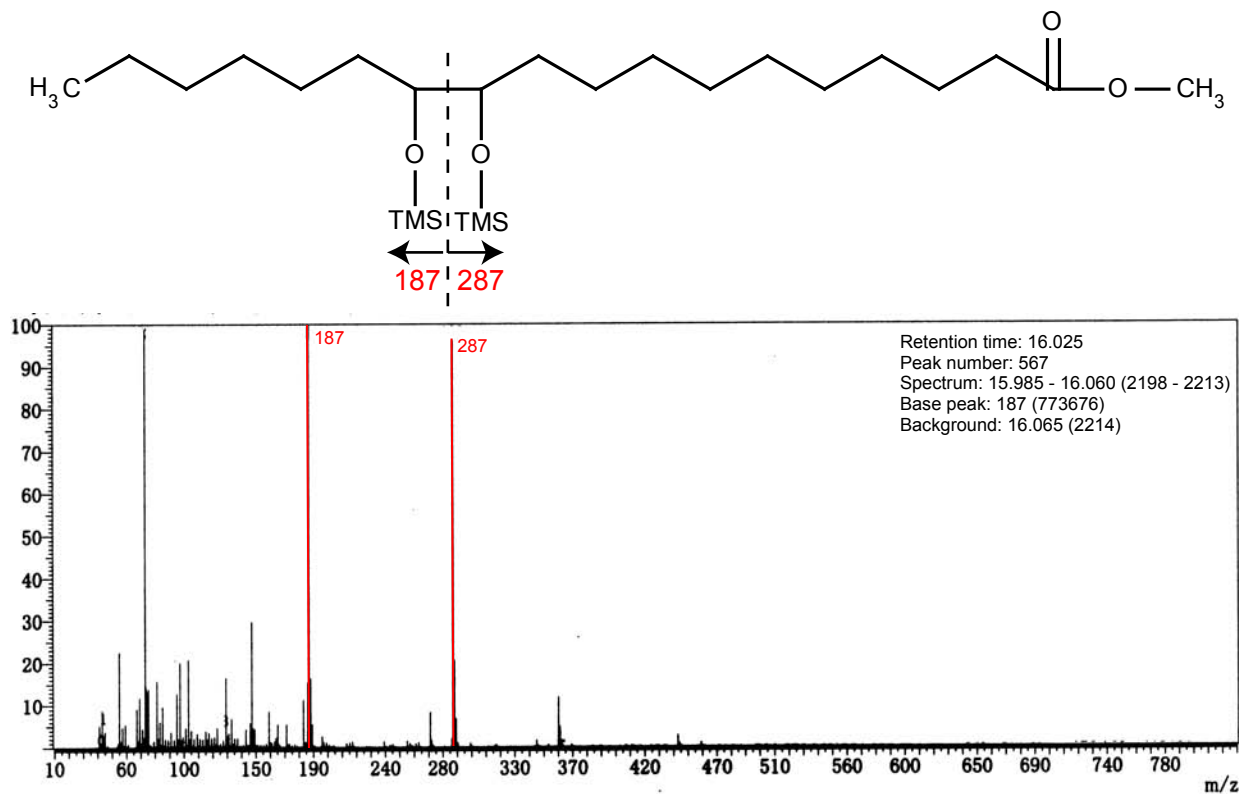

Pyrrolidide derivative

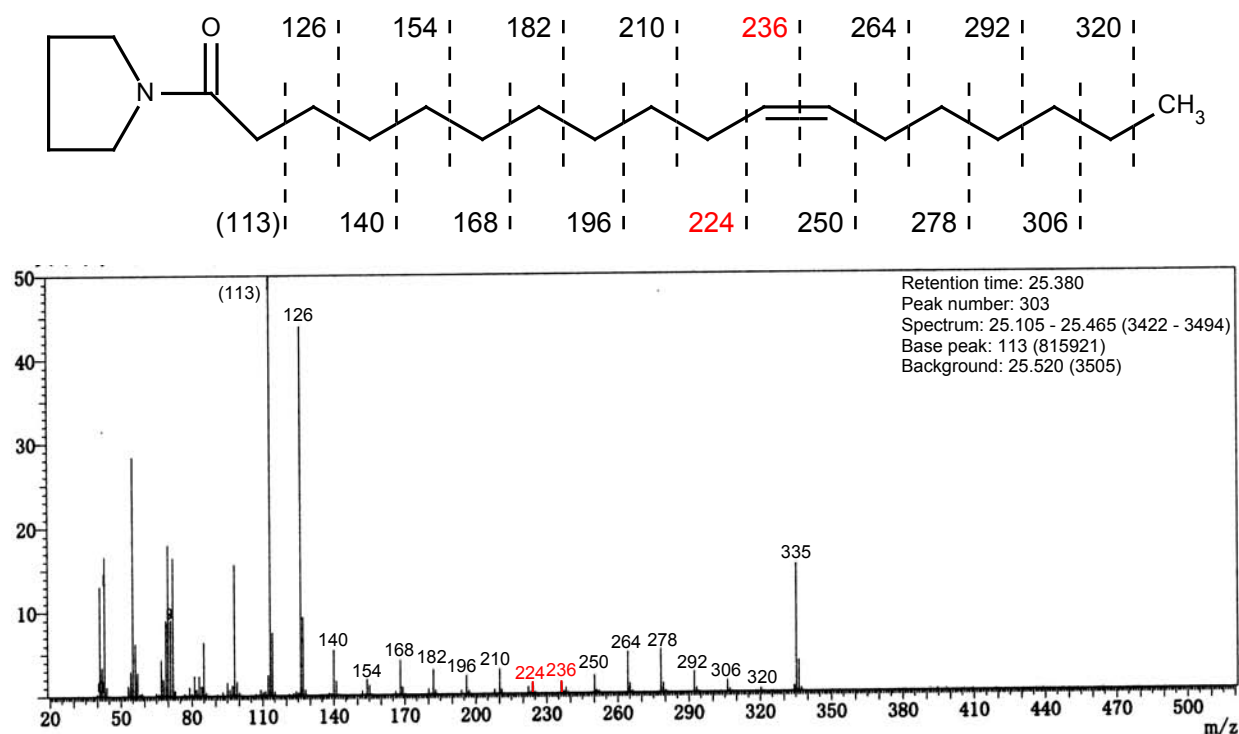

In the pyrrolidide derivatives of 18:1(11) and 18:1(13), the mass spectrum of these pyrrolidide derivatives was obtained from the same peak of gas chromatogram.

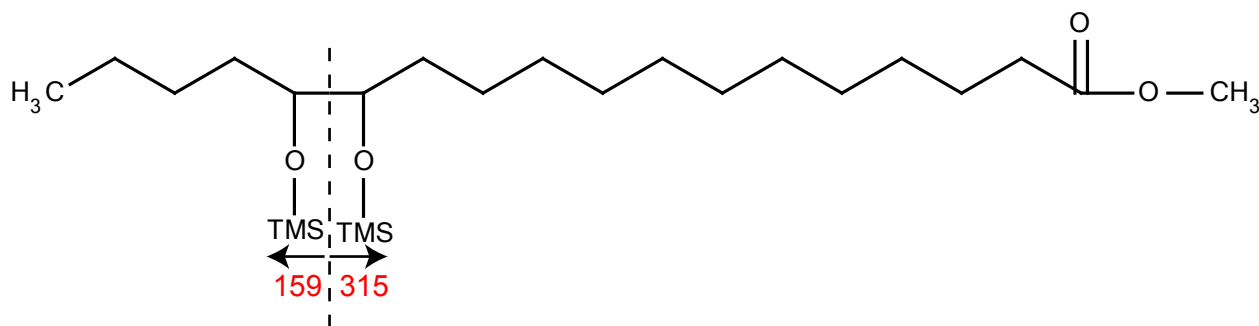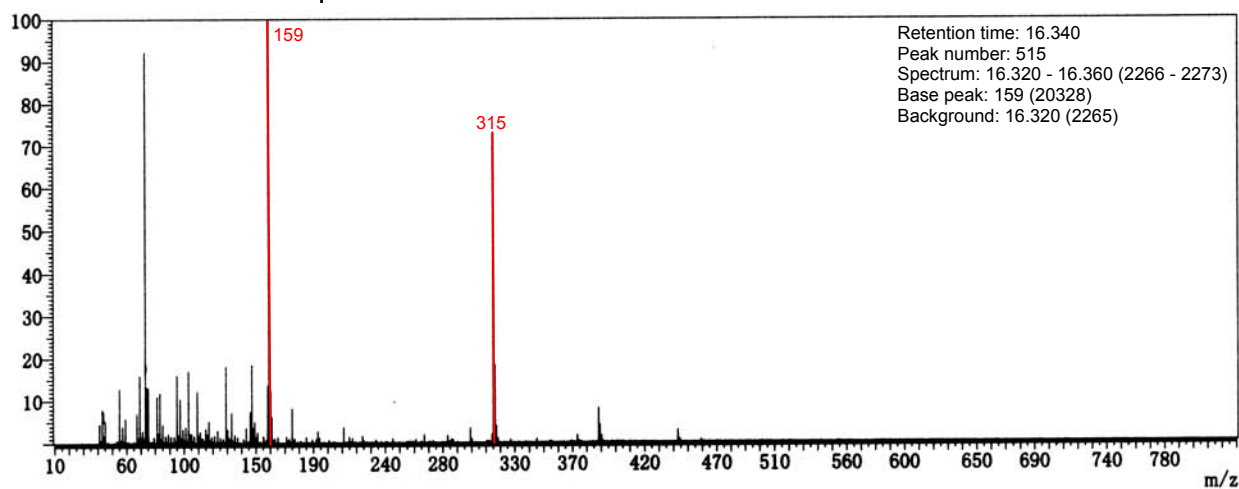

## Pyrrolidide derivative

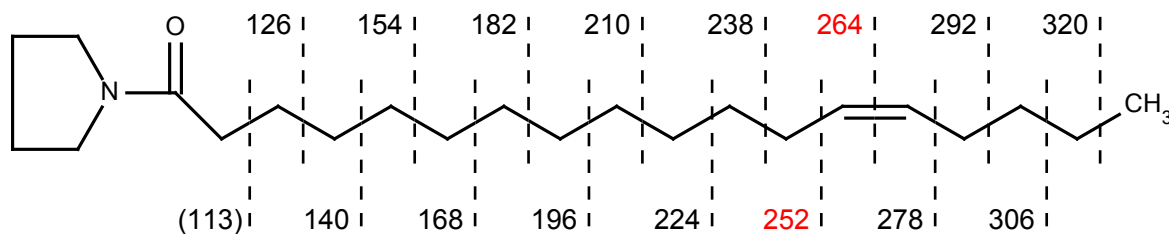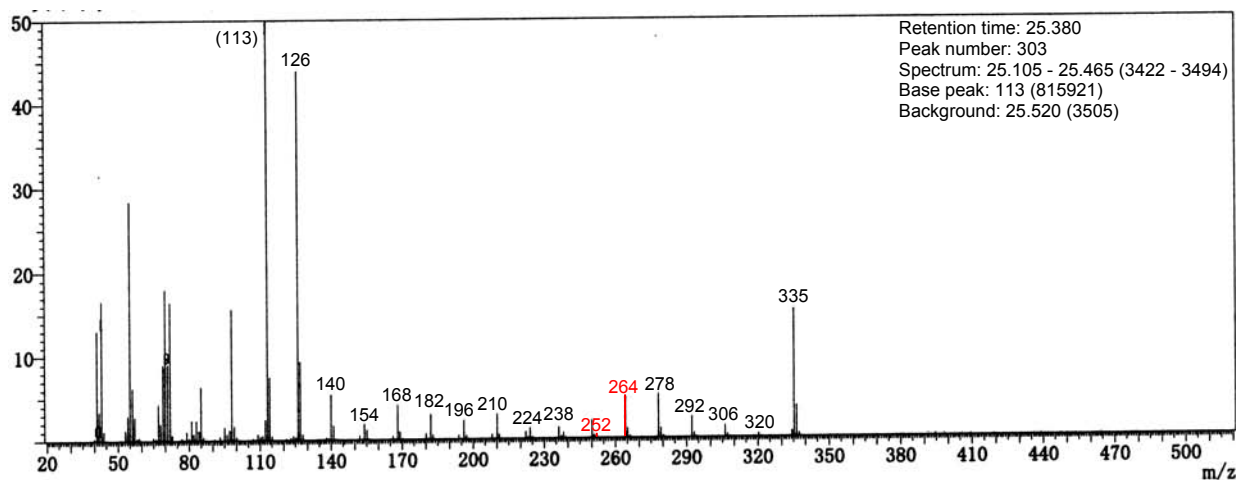

In the pyrrolidide derivatives of 18:1(11) and 18:1(13), the mass spectrum of these pyrrolidide derivatives was obtained from the same peak of gas chromatogram.

## Trimethylsilyl derivative

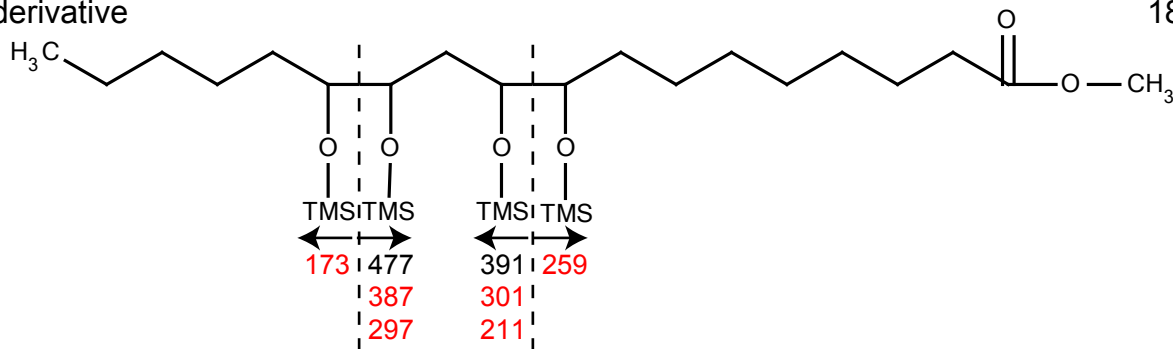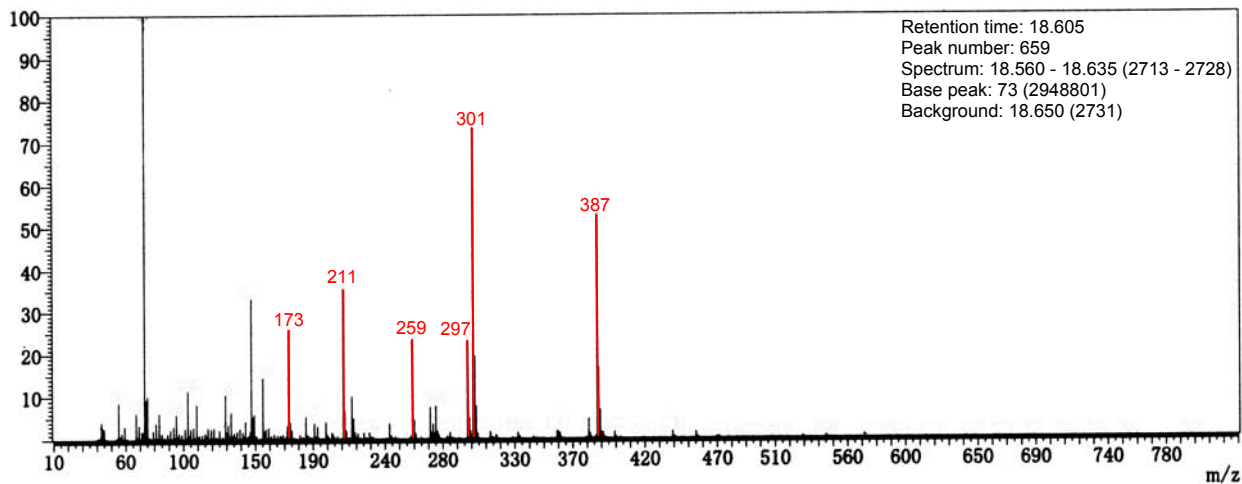

## Pyrrolidide derivative

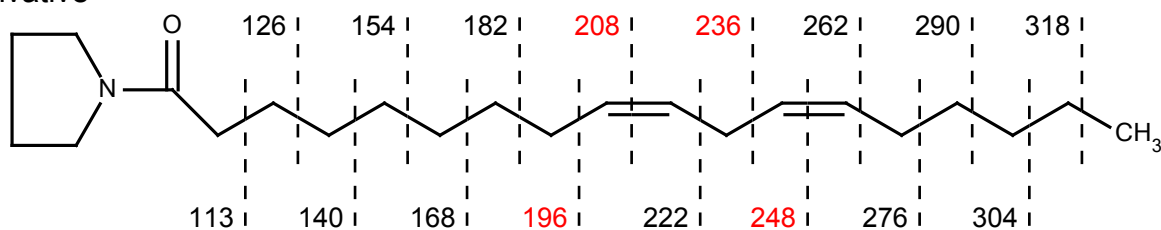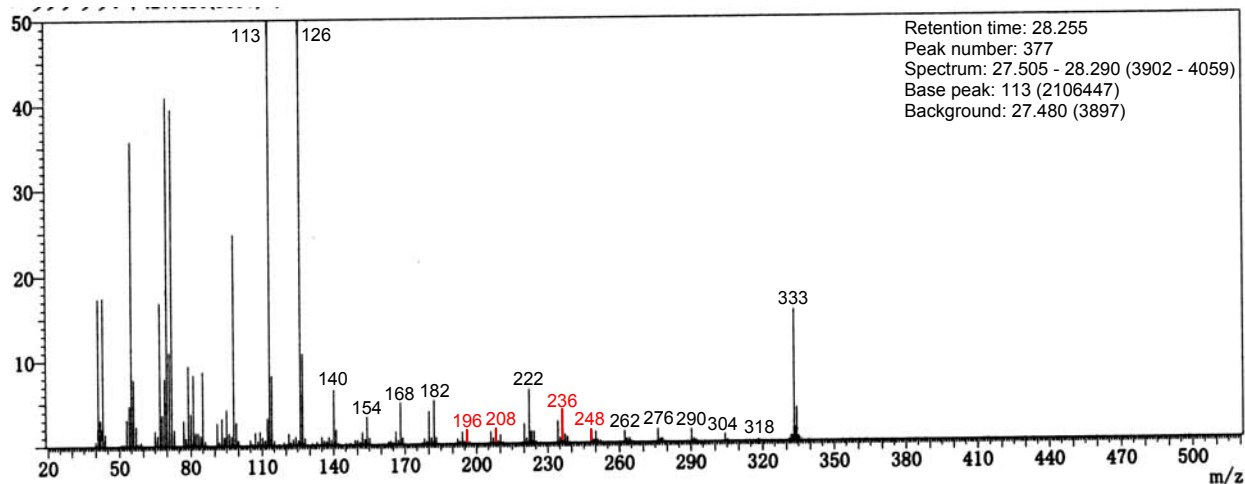

Trimethylsilyl derivative

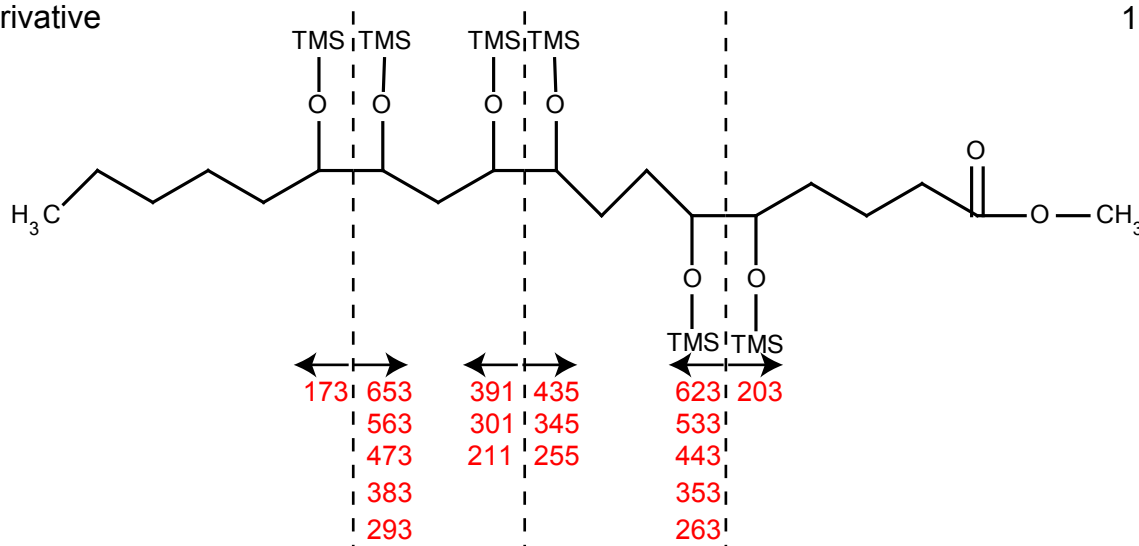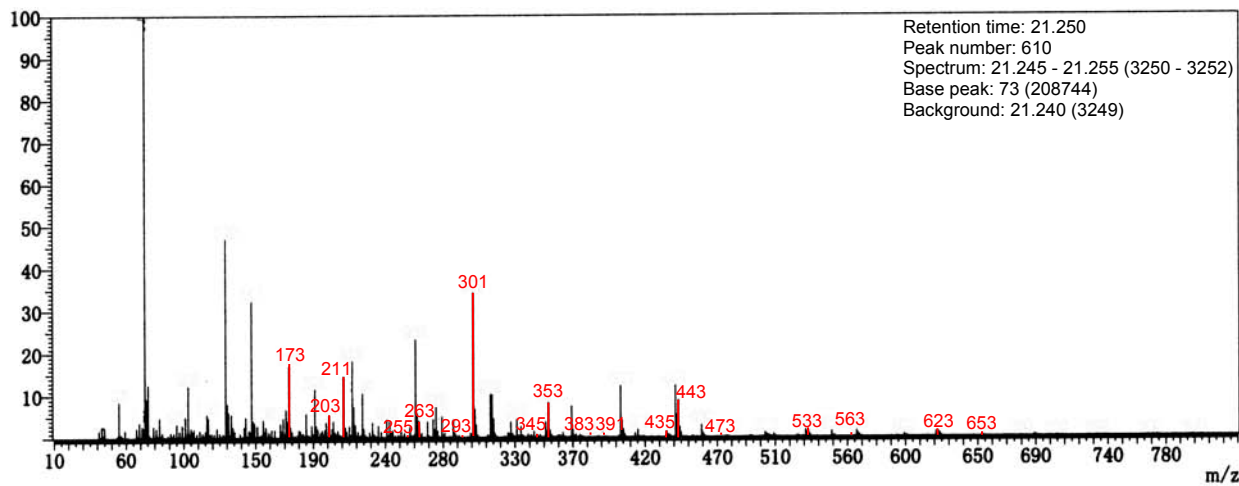

Pyrrolidide derivative

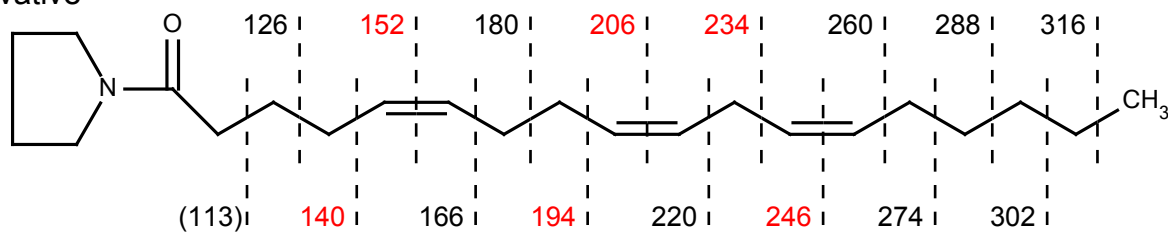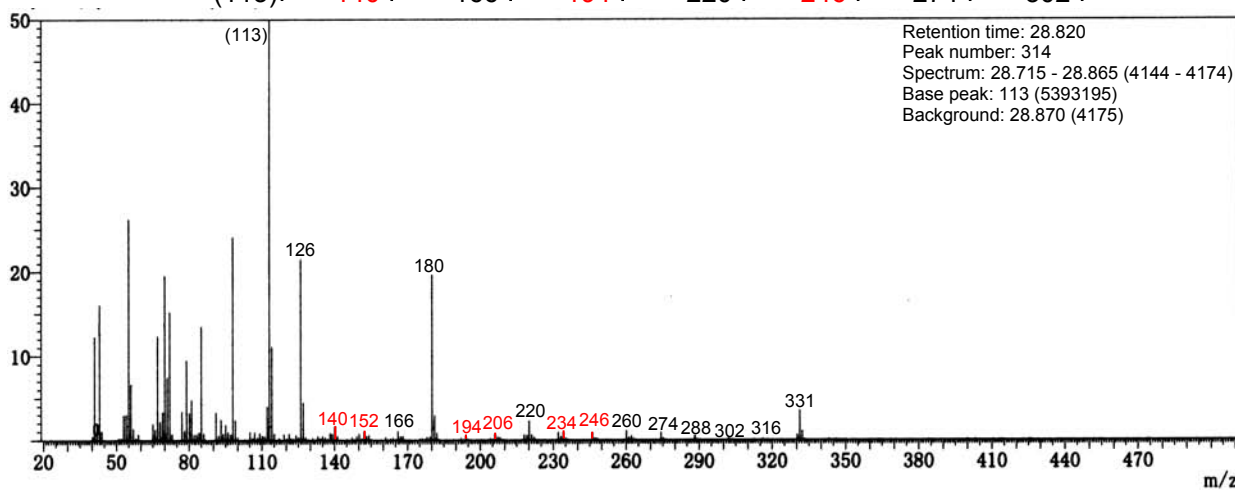

## Trimethylsilyl derivative

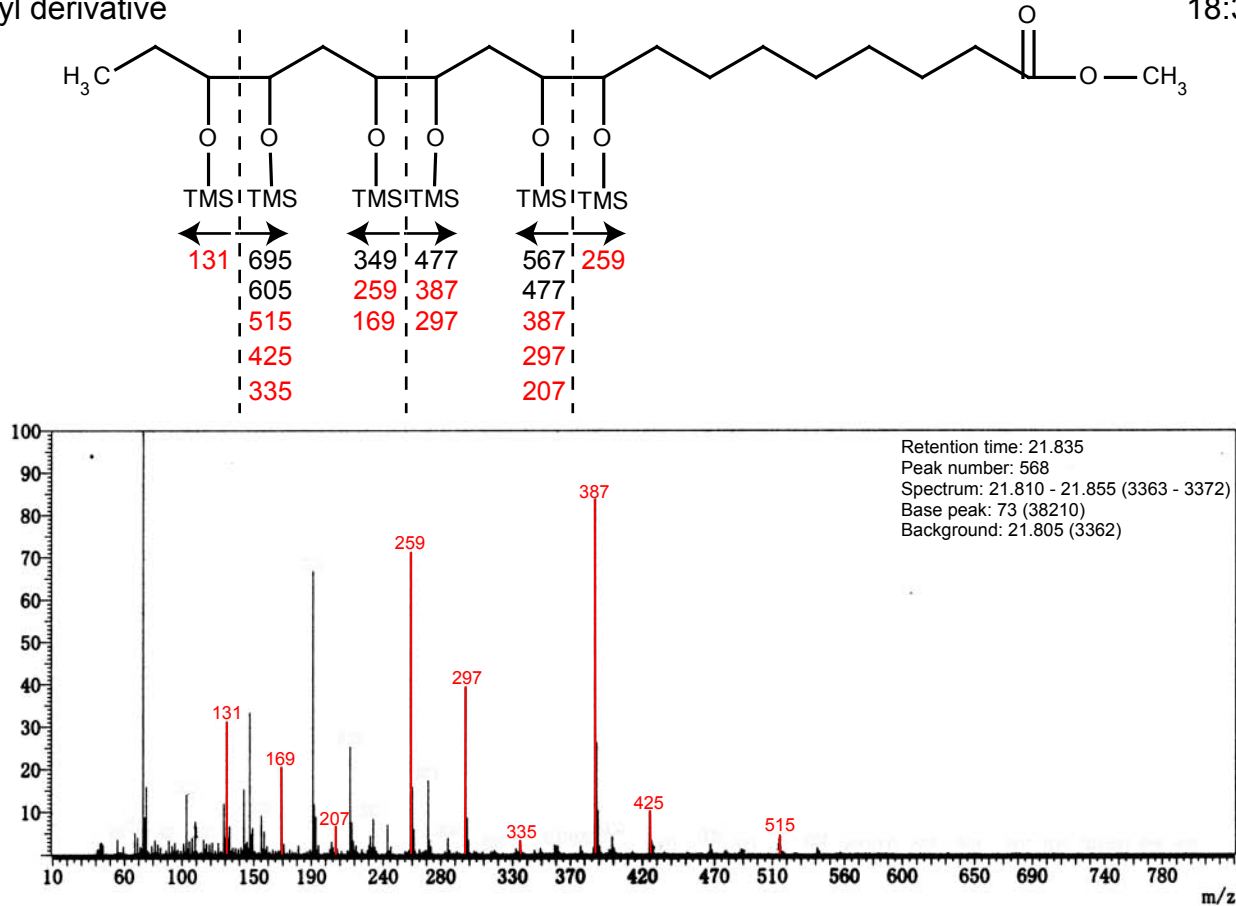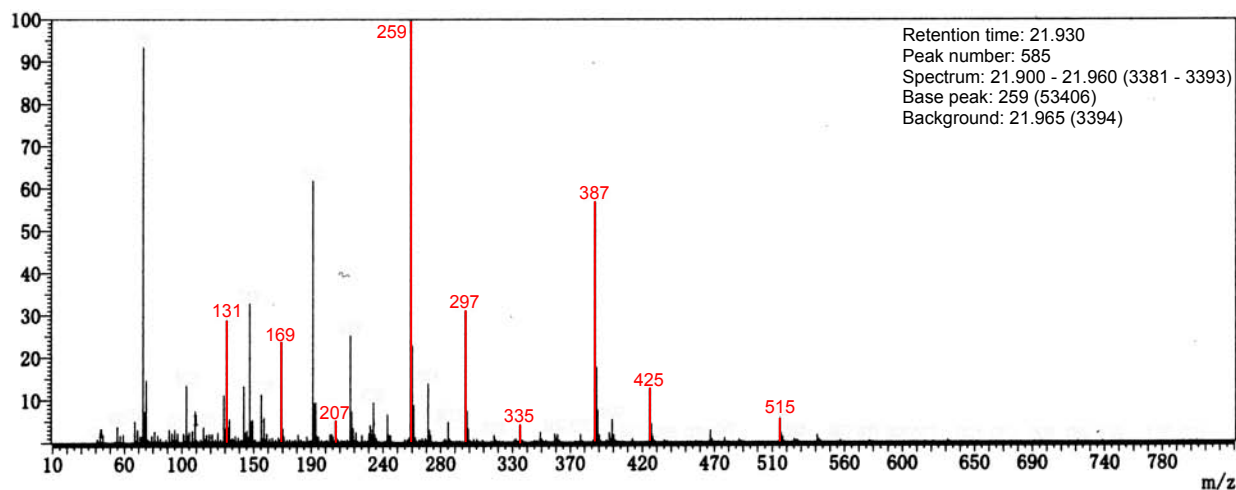

## Pyrrolidide derivative

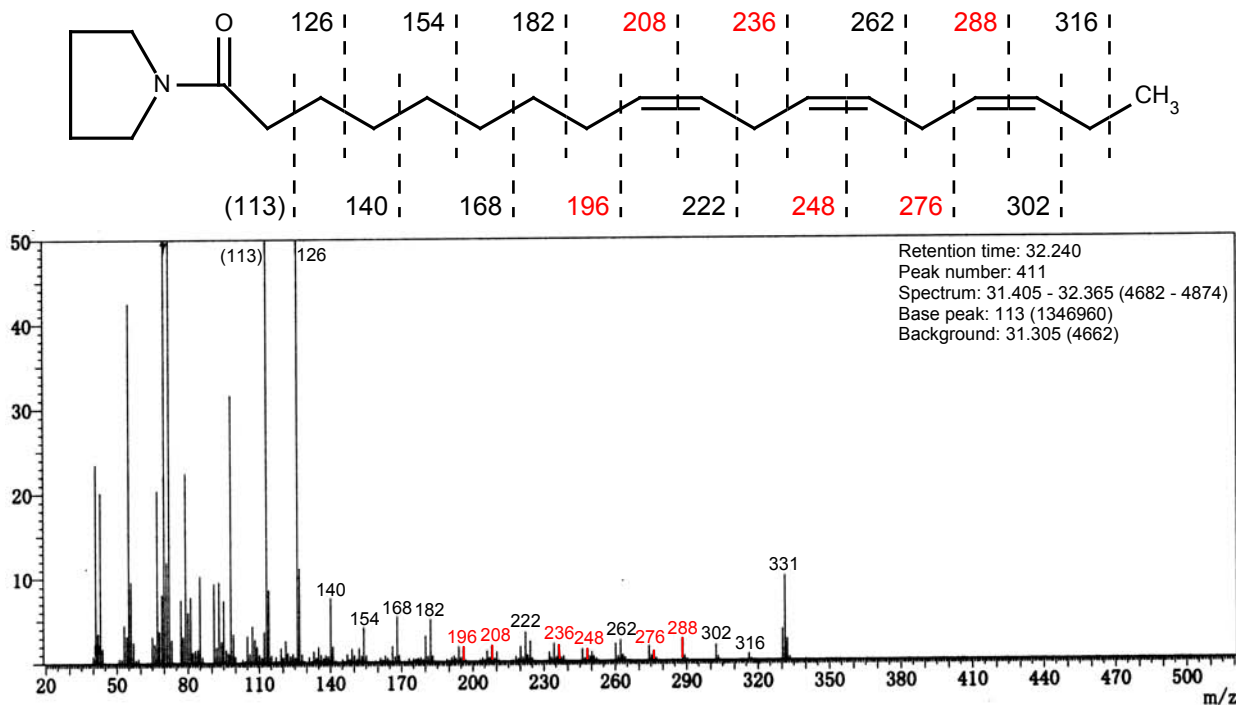

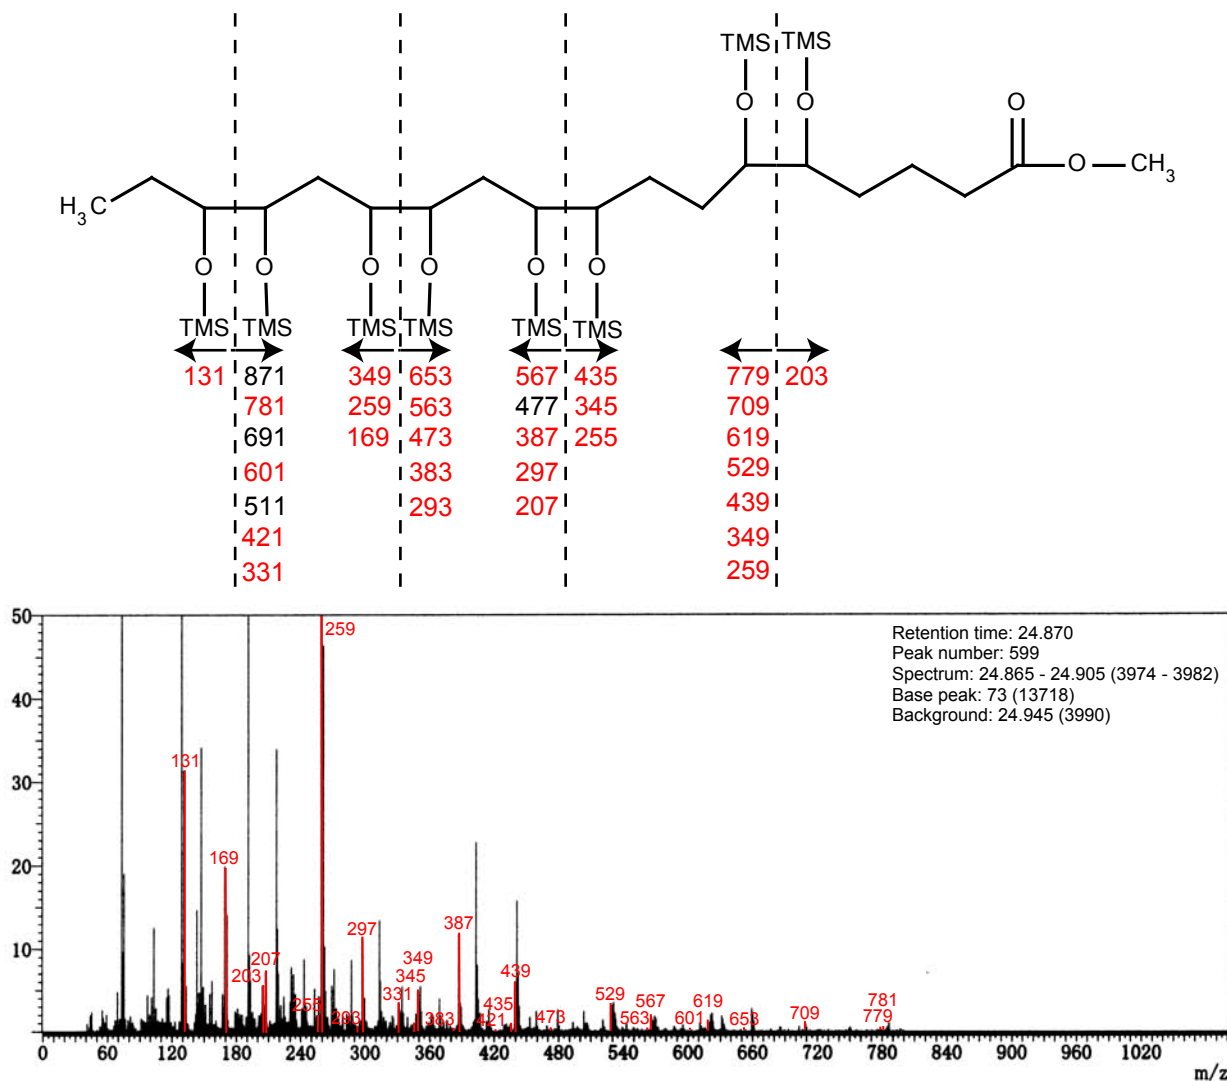

Pyrrolidide derivative

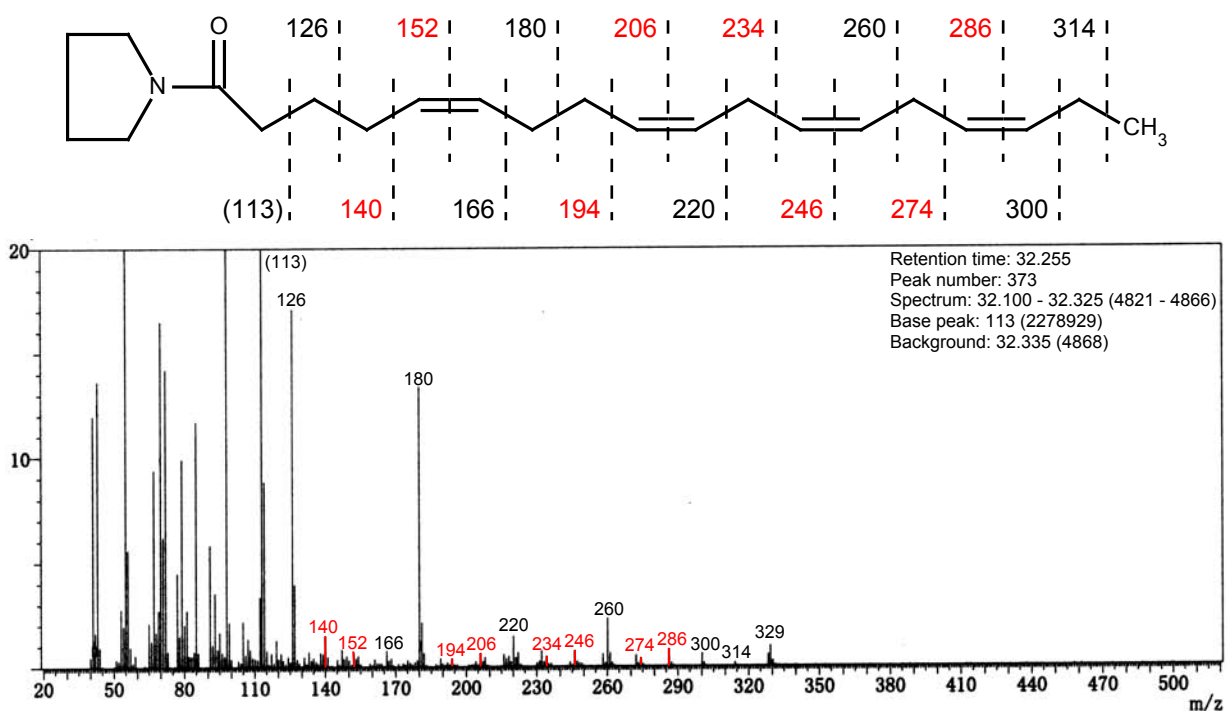

In the trimethylsilyl derivative of 18:4(5,9,12,15) and 18:4(6,9,12,15), the mass spectra of each derivative were obtained from the same peak of gas chromatogram.

In the pyrrolidide derivative of 18:4(5,9,12,15) and 18:4(6,9,12,15), the mass spectra of each derivative were obtained from the same peak of gas chromatogram.



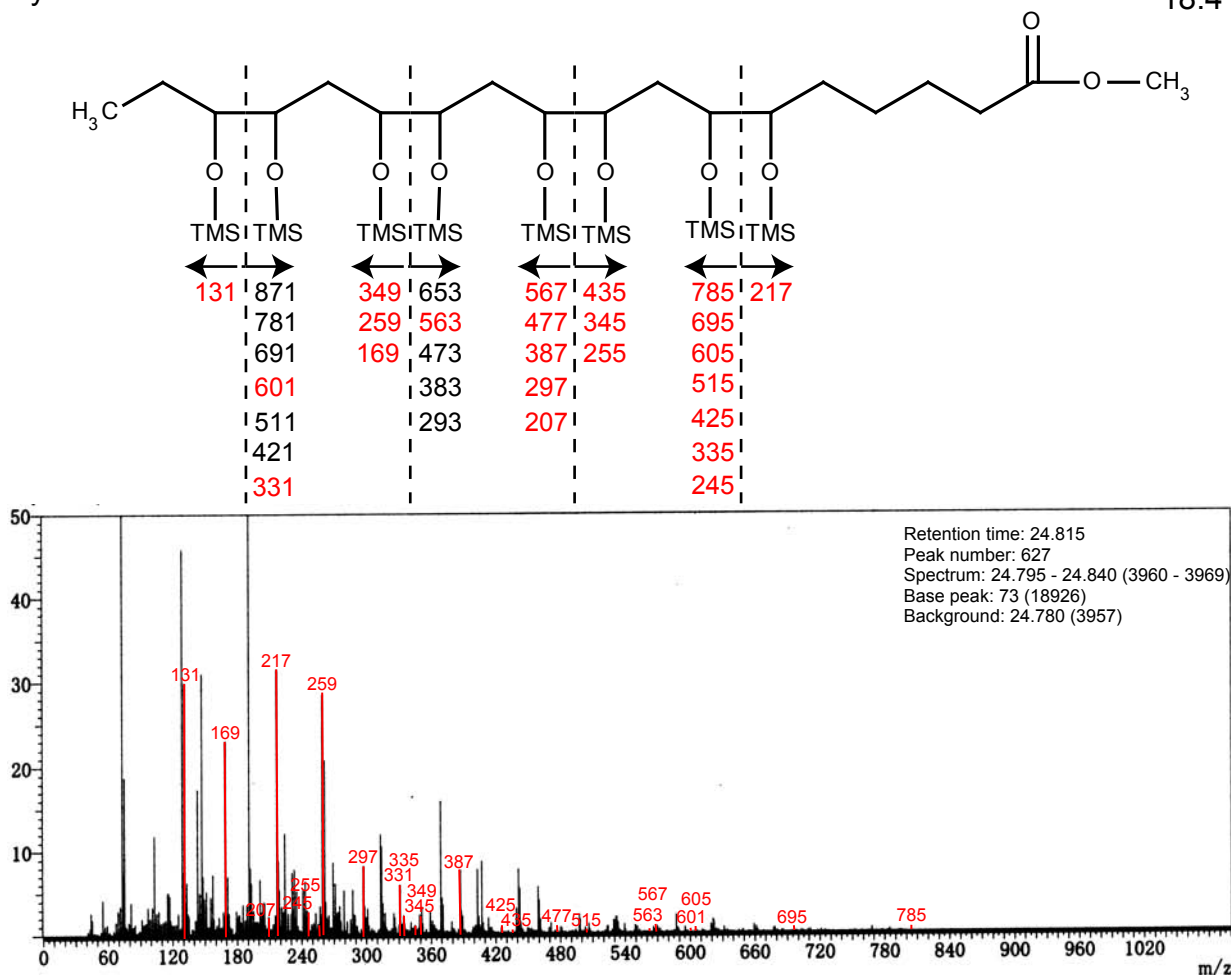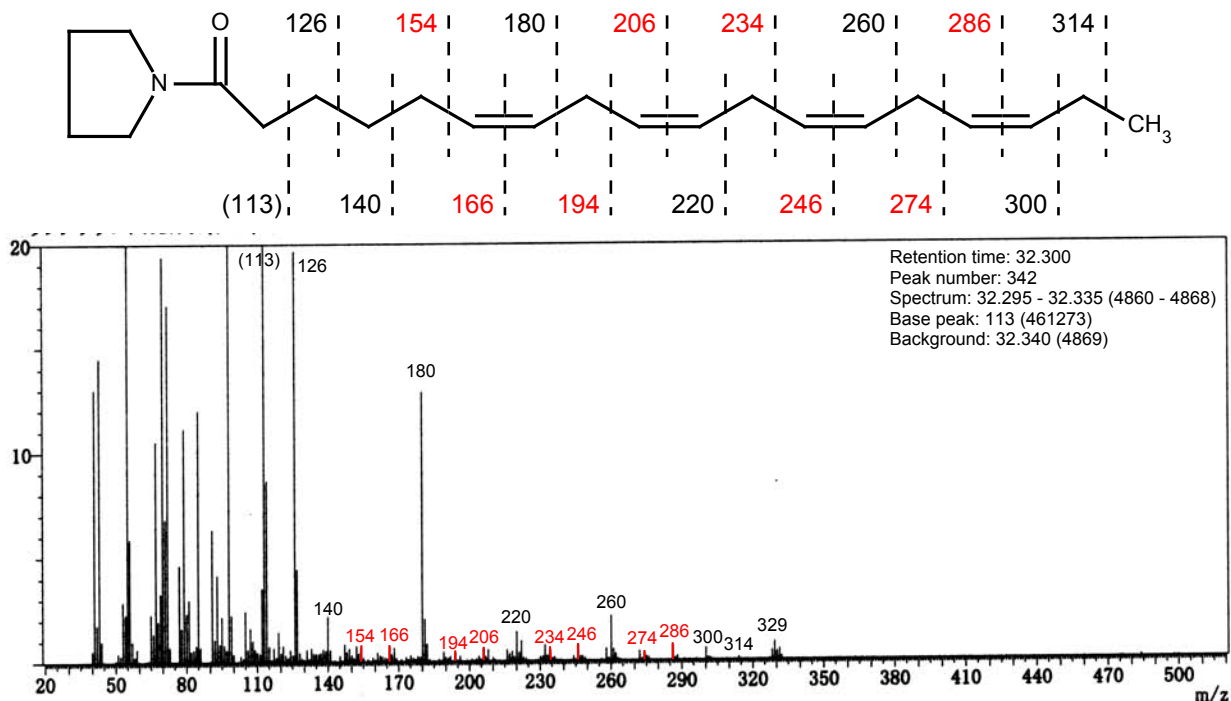

In the trimethylsilyl derivative of 18:4(5,9,12,15) and 18:4(6,9,12,15), the mass spectra of each derivative were obtained from the same peak of gas chromatogram.

In the pyrrolidide derivative of 18:4(5,9,12,15) and 18:4(6,9,12,15), the mass spectra of each derivative were obtained from the same peak of gas chromatogram.



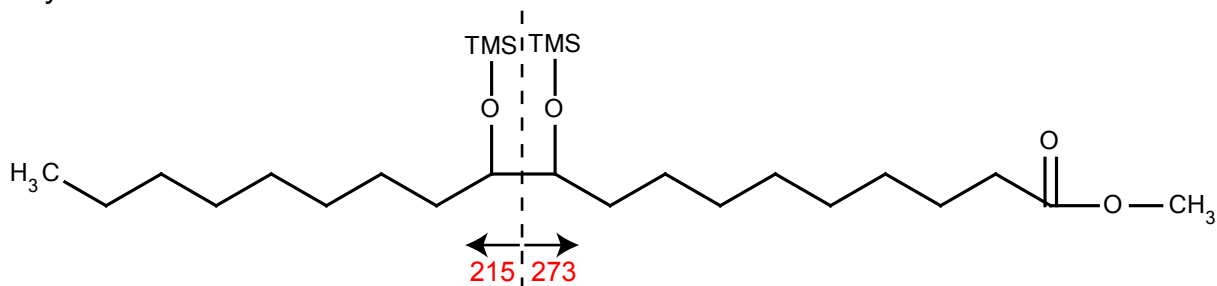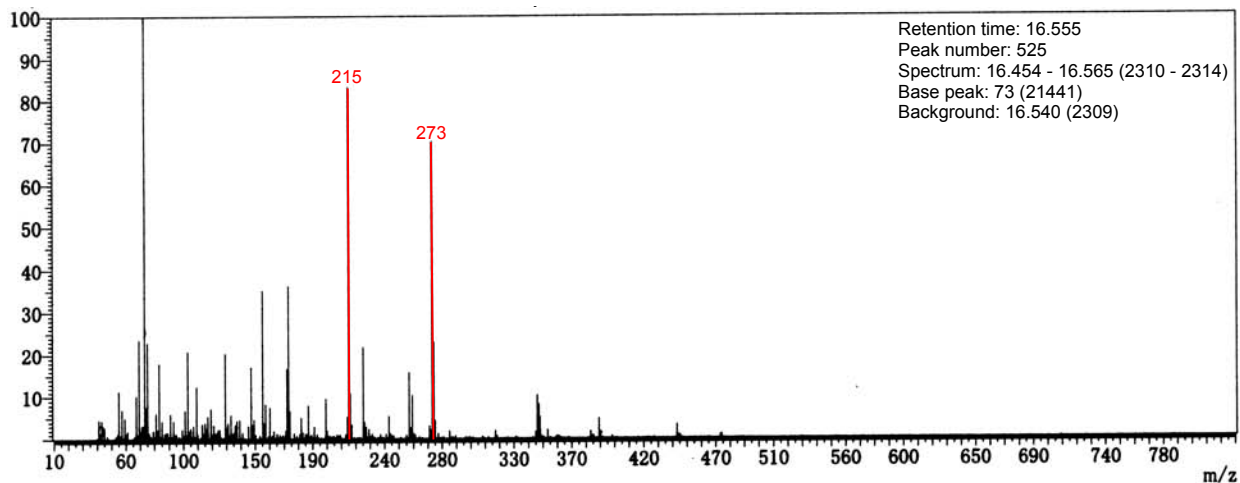

Pyrrolidide derivative

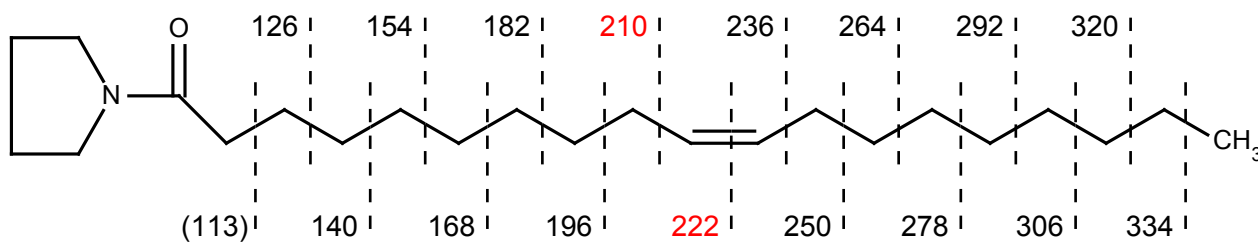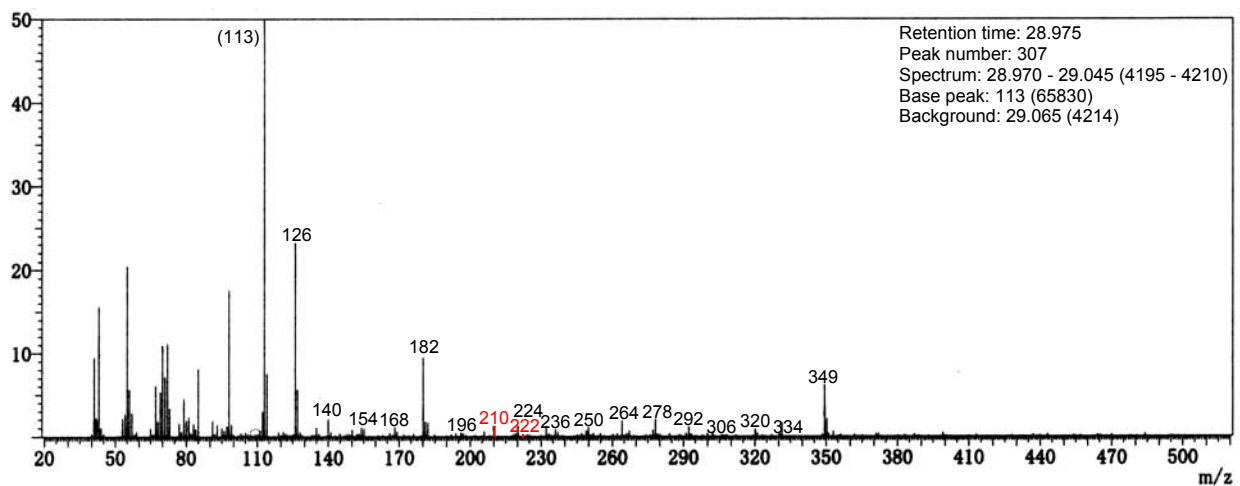

In the pyrrolidide derivatives of 19:1(10) and 19:1(13), the mass spectrum of these pyrrolidide derivatives was obtained from the same peak of gas chromatogram.

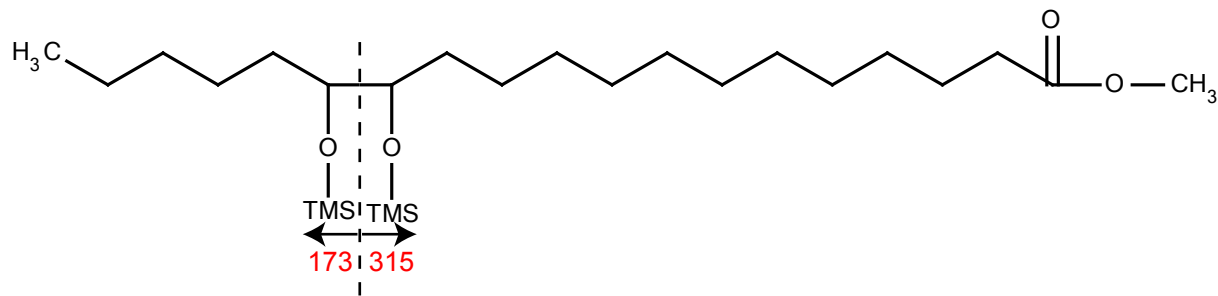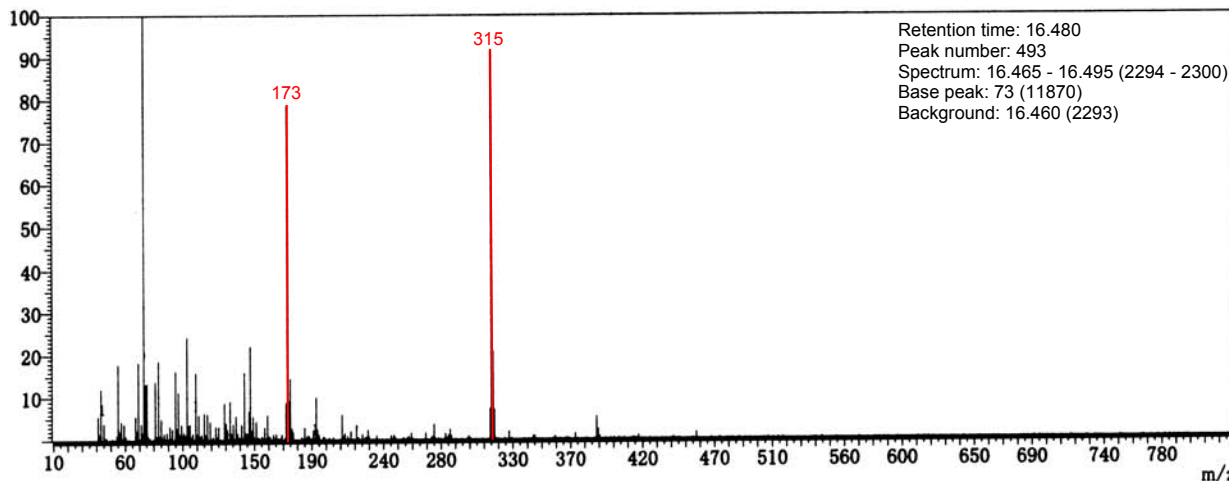

Pyrrolidide derivative

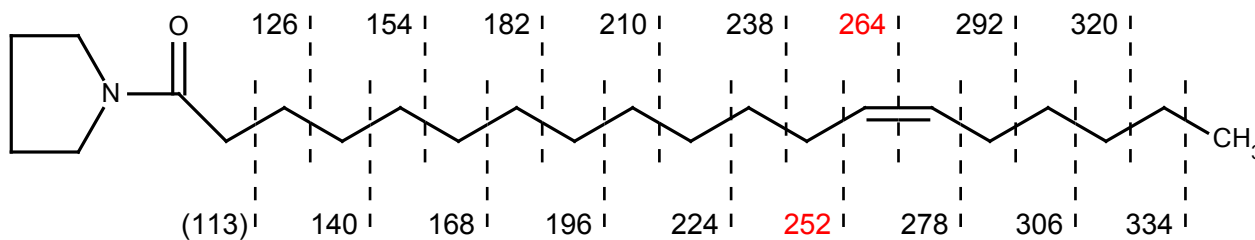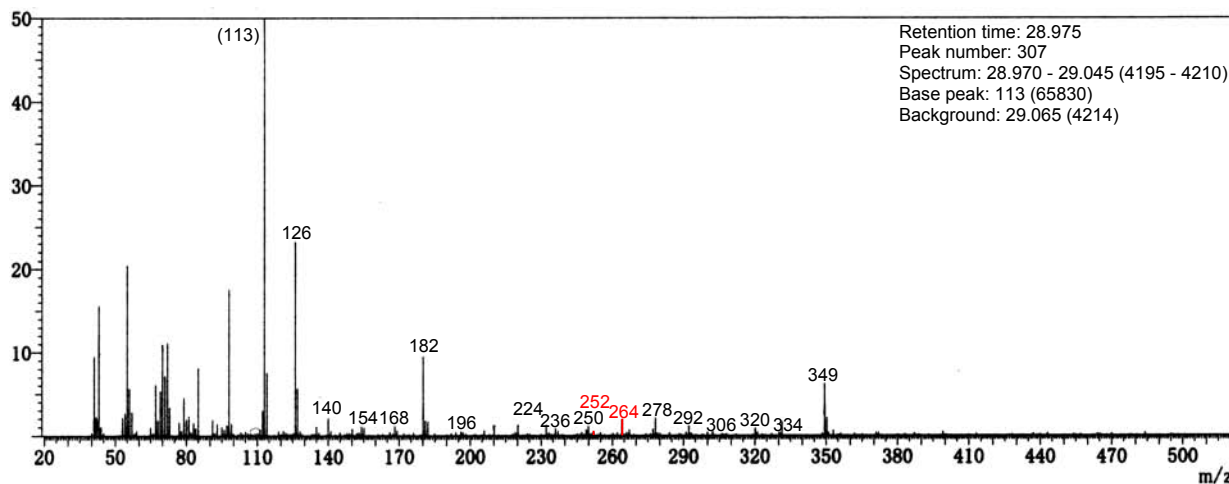

In the pyrrolidide derivatives of 19:1(10) and 19:1(13), the mass spectrum of these pyrrolidide derivatives was obtained from the same peak of gas chromatogram.

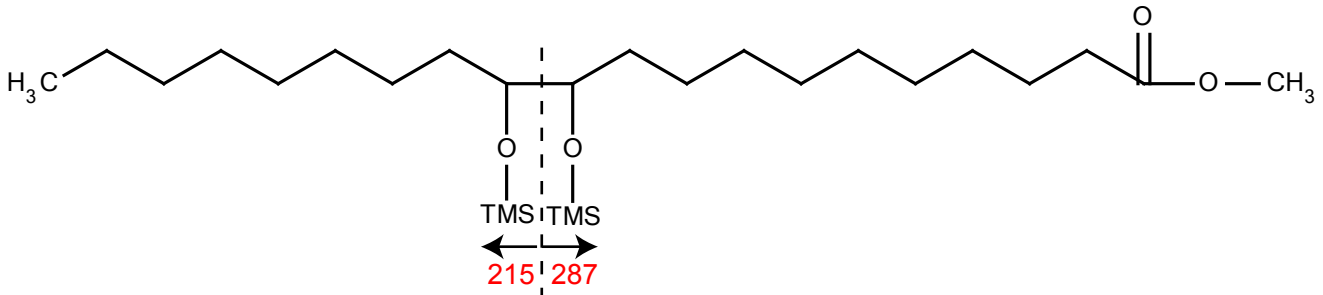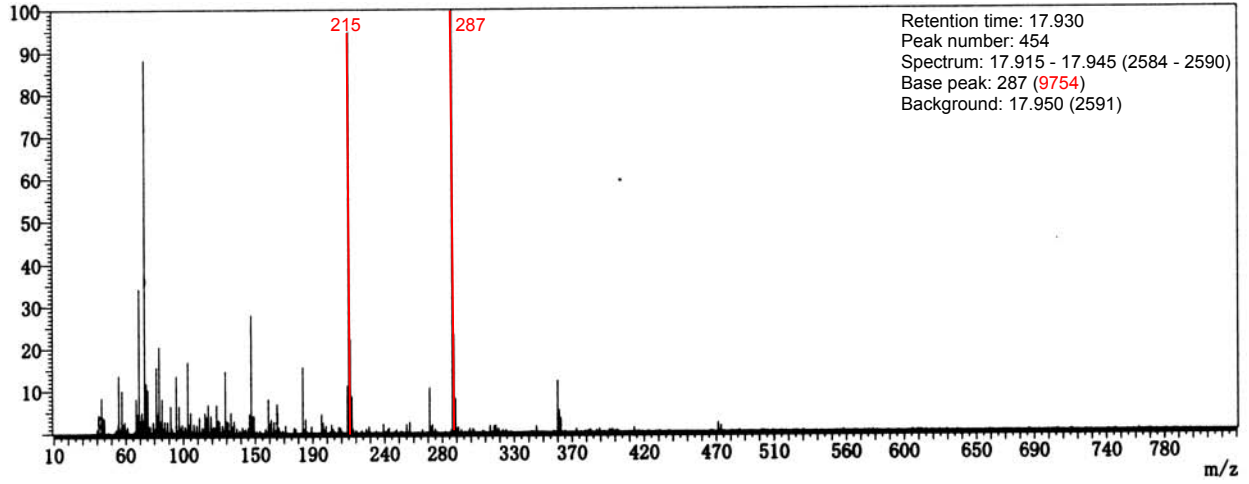

Pyrrolidide derivative

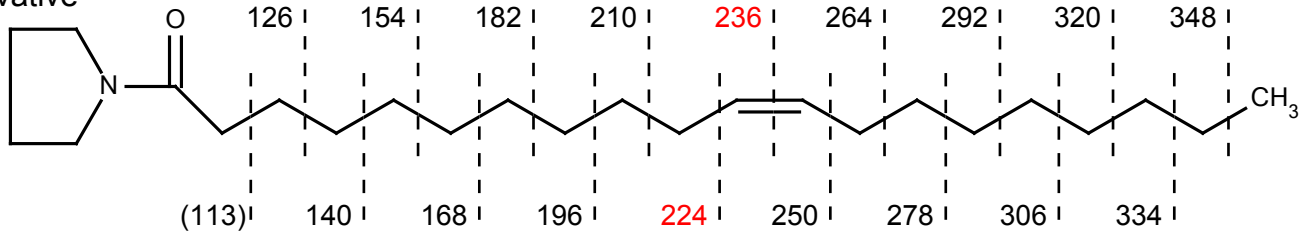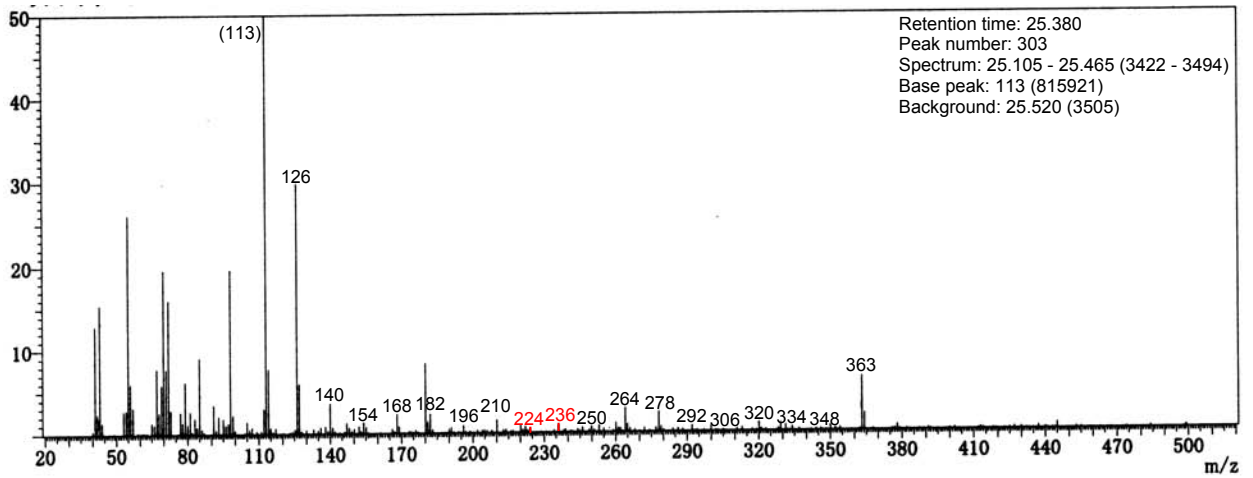

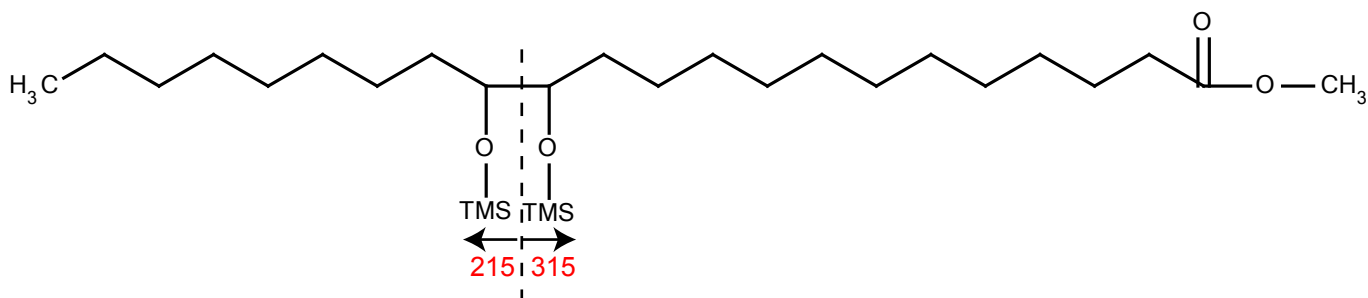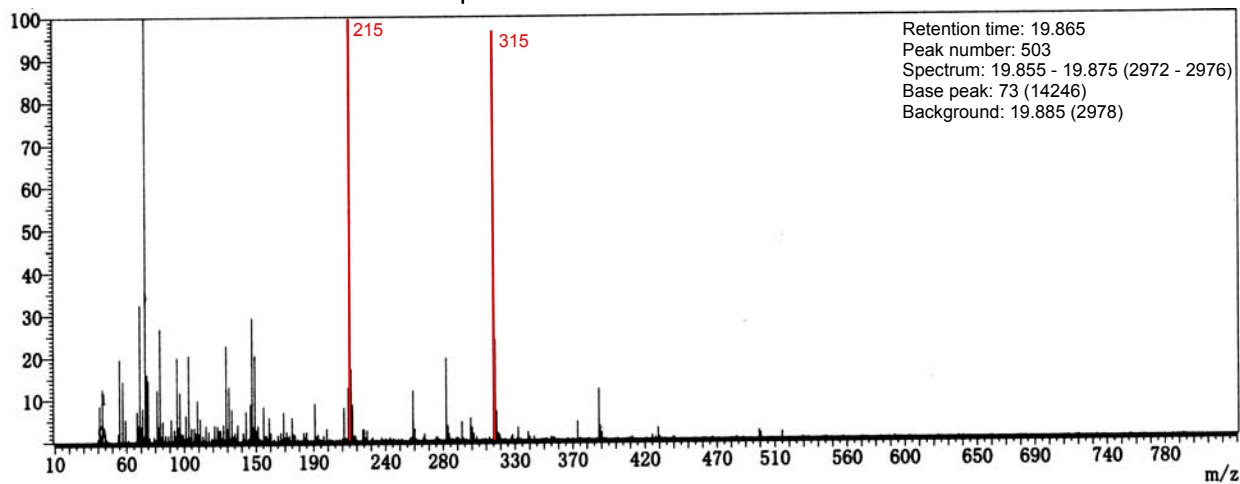

Pyrrolidide derivative

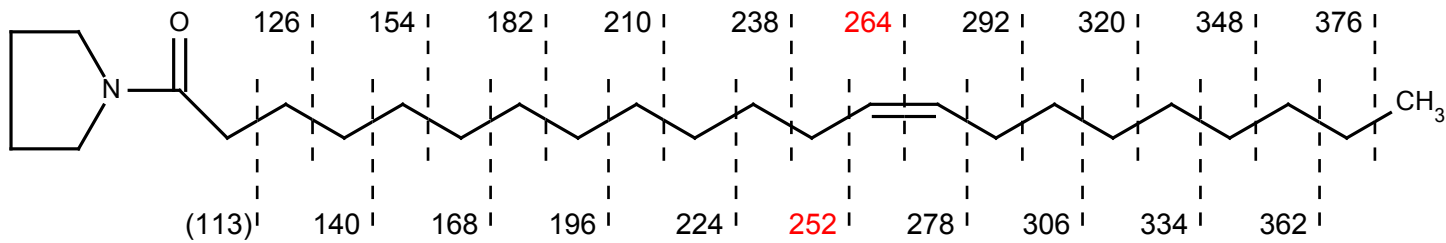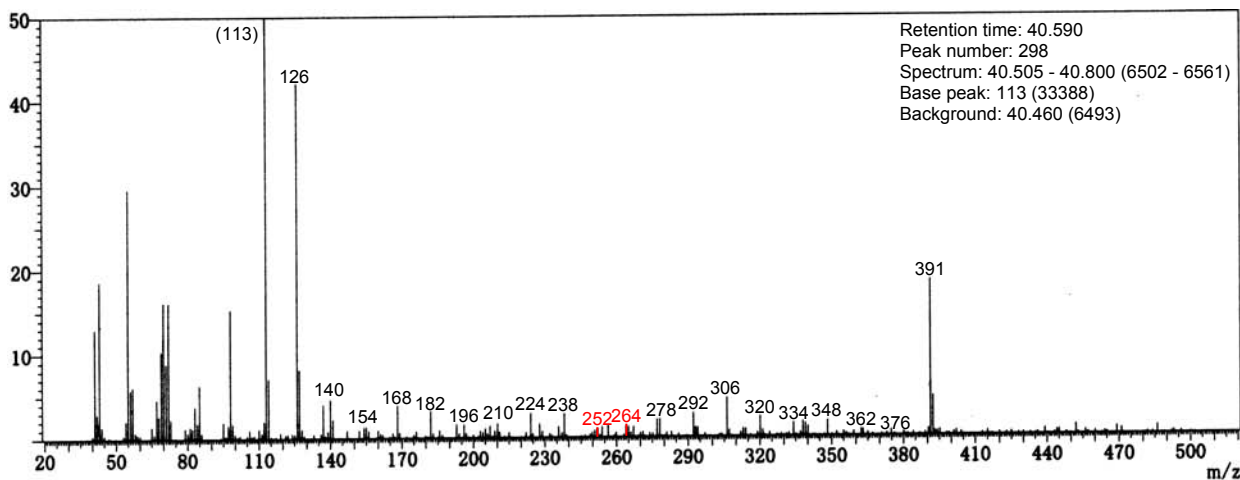

Supplement: EC.00280-13_zek999094229so1.pdf [file EC.00280-13_zek999094229so1.pdf]
